# Supplementary material for: Genome-wide mega-analysis identifies 16 loci and highlights diverse biological mechanisms in the common epilepsies
Source: Springer Nature journal article supplement (doi:10.1038/s41467-018-07524-z), 2018-12-04
Supplement: MOESM1 [file 41467_2018_7524_MOESM1_ESM.pdf › 41467_2018_7524_MOESM1_ESM.pdf]

# Genome-wide mega-analysis identifies 16 loci and highlights diverse biological mechanisms in the common epilepsies

The International League Against Epilepsy Consortium on Complex Epilepsies

## Supplementary Tables 2

|                                                                                                    |    |
|----------------------------------------------------------------------------------------------------|----|
| Supplementary Table 1: Overview of number of epilepsy cases stratified by phenotype and ethnicity. | 2  |
| Supplementary Table 2: Validation of the 6 biological prioritization criteria                      | 3  |
| Supplementary Table 3: Transcriptome-wide association analysis (TWAS)                              | 4  |
| Supplementary Table 4: Examples of significant drug repurposing candidates                         | 5  |
| Supplementary Table 5: The genetic correlations of epilepsy with other phenotypes                  | 6  |
| Supplementary Table 6: Details of participating cohorts                                            | 8  |
| Supplementary Table 7: Estimation of inflation factor and the LD-score regression intercept        | 8  |
| Supplementary Table 8: List of selected monogenic epilepsy genes                                   | 8  |
| Supplementary Table 9: brain-coX in silico gene co-expression prioritization                       | 10 |
| Supplementary Table 10: List of genes that are targets of currently used anti-epileptic drugs      | 11 |
| Supplementary Table 11: SNP-based heritabilities                                                   | 11 |
| Supplementary Table 12: Comparative SNP-based heritability estimates                               | 12 |

## Supplementary Figures 13

|                                                                                                            |    |
|------------------------------------------------------------------------------------------------------------|----|
| Supplementary Figure 1: Principal component plots                                                          | 13 |
| Supplementary Figure 2: Quantile-quantile (Q-Q) plots. Q-Q plots of meta-analyses                          | 14 |
| Supplementary Figure 3: Conditional analysis of 2q24.3                                                     | 15 |
| Supplementary Figure 4: Manhattan plots for the 7 epilepsy subtypes                                        | 16 |
| Supplementary Figure 5: Q-Q plots of the 7 epilepsy subtypes                                               | 17 |
| Supplementary Figure 6: Forest plot of the lead SNPs                                                       | 18 |
| Supplementary Figure 7: Locuszoom plots for all genome-wide significant loci. Genome-wide significant loci | 21 |
| Supplementary Figure 8: GWAS results of genetic generalized epilepsy conditioned on expression of PNPO     | 21 |
| Supplementary Figure 9: Gene co-expression matrix produced by brain-coX                                    | 22 |
| Supplementary Figure 10: Heritability enrichment of 6 different chromatin markers in 88 tissues            | 23 |
| Supplementary Figure 11: Heritability enrichment of genes expressed in 53 tissues                          | 24 |
| Supplementary Figure 12: MAGMA gene expression enrichment analysis                                         | 25 |
| Supplementary Figure 13: Differentially expressed genes across the lifespan                                | 26 |
| Supplementary Figure 14: Results of MTAG analysis                                                          | 26 |
| Supplementary Figure 15: Power curves for GWAS                                                             | 27 |

## Supplementary References 28

## Supplementary Tables

| Phenotype             | Epilepsy sub-phenotypes                                                | n             | CAU           | ASI          | AFR          |
|-----------------------|------------------------------------------------------------------------|---------------|---------------|--------------|--------------|
| Generalized           | Generalized Epilepsy, not otherwise specified, with spike and wave EEG | 1,297         | 1,258         | 0            | 33           |
|                       | Childhood Absence Epilepsy (CAE)                                       | 793           | 778           | 0            | 15           |
|                       | Juvenile Absence Epilepsy (JAE)                                        | 415           | 415           | 0            | 0            |
|                       | Juvenile Myoclonic Epilepsy (JME)                                      | 1,181         | 1,177         | 0            | 10           |
|                       | GTCS alone, with spike and wave EEG                                    | 228           | 225           | 0            | 3            |
|                       | <b>Subtotal</b>                                                        | <b>3,769*</b> | <b>3,708*</b> | <b>0</b>     | <b>61</b>    |
| Focal                 | Focal Epilepsy, not otherwise specified                                | 3,082         | 2,975         | 49           | 58           |
|                       | Focal Epilepsy, documented lesion negative                             | 2,716         | 2,660         | 31           | 25           |
|                       | Focal Epilepsy, documented hippocampal sclerosis (HS)                  | 803           | 709           | 91           | 3            |
|                       | Focal Epilepsy, documented lesion other than HS                        | 3,070         | 2,751         | 319          | 0            |
|                       | <b>Subtotal</b>                                                        | <b>9,671</b>  | <b>9,095</b>  | <b>490</b>   | <b>86</b>    |
| Unclassified          | Epilepsy, not otherwise specified                                      | 1,772         | 1,731         | 41           | 0            |
| <b>Cases</b>          |                                                                        | <b>15,212</b> | <b>14,534</b> | <b>531</b>   | <b>147</b>   |
| <b>Controls</b>       |                                                                        | <b>29,677</b> | <b>24,218</b> | <b>2,875</b> | <b>2,584</b> |
| <b>Total subjects</b> |                                                                        | <b>44,889</b> | <b>38,752</b> | <b>3,406</b> | <b>2,731</b> |

Supplementary Table 1: Overview of number of epilepsy cases stratified by phenotype and ethnicity. After quality controls we had 15,212 cases and 29,677 controls. Subjects were classified into focal or genetic generalized epilepsy (and their respective syndromes), or unclassified epilepsy. CAU: Caucasian, ASI: Asian, AFR: African. \*145 subjects with dual CAE/JAE diagnosis were included in both the analyses of CAE and JME respectively.

|                           | TWAS | eQTL | Brain exp e | Missens | PPI  | KO mouse | Total score |
|---------------------------|------|------|-------------|---------|------|----------|-------------|
| Correlation coef          | 0.07 | 0.08 | 0.33        | 0.13    | 0.14 | 0.26     | 0.42        |
| Sensitivity               | 0.17 | 0.17 | 1.00        | 0.17    | 0.50 | 0.83     | 0.83        |
| Specificity               | 0.93 | 0.94 | 0.74        | 0.96    | 0.79 | 0.75     | 0.89        |
| Postive predictive value  | 0.09 | 0.10 | 0.14        | 0.17    | 0.09 | 0.13     | 0.24        |
| Negative predictive value | 0.96 | 0.96 | 1.00        | 0.96    | 0.97 | 0.99     | 0.99        |

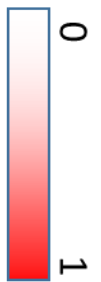

Supplementary Table 2: Validation of the 6 biological prioritization criteria (Figure 2) to predict established monogenic epilepsy genes. A list of 102 established monogenic epilepsy genes (see Supplementary Table 8) was used to calculate the correlation, sensitivity, specificity, positive predictive value and negative predictive value of the prioritization criteria in predicting established epilepsy genes out of the 146 genes that were mapped to genome-wide significant loci (Supplementary Data file 1). The total score is the sum of criteria being met per gene (range 0-6). Correlation coefficients are calculated as Pearson correlations. The “total score” column represents our approach of selecting the gene(s) with the highest score within each locus as prioritized epilepsy genes.

| Phenotype                    | Gene ID  | HSQ    | BEST.GWAS.ID | EQTL.ID    | MODEL | MODEL.CV.R2 | MODEL.CV.PV | TWAS.Z    | TWAS.P   |
|------------------------------|----------|--------|--------------|------------|-------|-------------|-------------|-----------|----------|
| All epilepsy                 | HEATR3   | 0.1472 | rs4638568    | rs7186889  | lasso | 0.19531     | 2.97E-23    | 1.0508    | 0.293351 |
|                              | ADCY7    | 0.1011 | rs4638568    | rs1362622  | enet  | 0.05077     | 7.76E-07    | -0.21526  | 0.829565 |
|                              | VRK2     | 0.0677 | rs4671319    | rs11125739 | bslmm | 0.015528    | 4.59E-03    | 0.099582  | 0.920676 |
|                              | FANCL    | 0.0611 | rs4671319    | rs11682175 | blup  | 0.029378    | 1.48E-04    | 3.443959  | 0.000573 |
|                              | COBLL1   | 0.0496 | rs10497257   | rs3769876  | lasso | 0.026154    | 3.27E-04    | 0.22521   | 0.821816 |
|                              | GALNT3   | 0.075  | rs6731869    | rs6717367  | lasso | 0.069706    | 7.21E-09    | -3.06498  | 0.002177 |
|                              | SCN9A    | 0.0974 | rs6731869    | rs13034090 | bslmm | 0.075715    | 1.62E-09    | 1.141746  | 0.25356  |
|                              | SCN7A    | 0.1072 | rs6731869    | rs3748895  | bslmm | 0.047216    | 1.86E-06    | -1.498476 | 0.13401  |
| Focal epilepsy               | COBLL1   | 0.0496 | rs4667729    | rs3769876  | lasso | 0.026154    | 3.27E-04    | -0.578968 | 0.562611 |
|                              | GALNT3   | 0.075  | rs6731869    | rs6717367  | lasso | 0.069706    | 7.21E-09    | -1.950729 | 0.051089 |
|                              | SCN9A    | 0.0974 | rs6731869    | rs13034090 | bslmm | 0.075715    | 1.62E-09    | 1.218455  | 0.223051 |
|                              | SCN7A    | 0.1072 | rs6731869    | rs3748895  | bslmm | 0.047216    | 1.86E-06    | -0.652246 | 0.514242 |
| Genetic generalized epilepsy | TBKBP1   | 0.0316 | rs886444     | rs9901869  | blup  | 0.00604     | 5.38E-02    | 2.6009    | 9.30E-03 |
|                              | MRPL10   | 0.3881 | rs886444     | rs3809869  | lasso | 0.44771     | 3.30E-60    | -0.6047   | 5.45E-01 |
|                              | SCRN2    | 0.3397 | rs886444     | rs17856536 | lasso | 0.23108     | 9.89E-28    | -0.1407   | 8.88E-01 |
|                              | PNPO     | 0.1487 | rs886444     | rs12602010 | bslmm | 0.09123     | 3.29E-11    | 4.8563    | 1.20E-06 |
|                              | CDK5RAP3 | 0.1518 | rs886444     | rs2240119  | bslmm | 0.13552     | 3.58E-16    | -2.0837   | 3.72E-02 |
|                              | SNX11    | 0.0383 | rs886444     | rs11079808 | lasso | 0.02549     | 3.85E-04    | -0.177    | 8.60E-01 |
|                              | UBXN2A   | 0.2198 | rs1862902    | rs12616678 | enet  | 0.235152    | 2.97E-28    | -0.25073  | 8.02E-01 |
|                              | TP53I3   | 0.1931 | rs1862902    | rs3731620  | lasso | 0.125388    | 5.10E-15    | 1.53797   | 1.24E-01 |
|                              | VRK2     | 0.0677 | rs1402398    | rs11125739 | bslmm | 0.015528    | 4.59E-03    | 0.62332   | 5.33E-01 |
|                              | FANCL    | 0.0611 | rs1402398    | rs11682175 | blup  | 0.029378    | 1.48E-04    | 4.72457   | 2.31E-06 |
|                              | COBLL1   | 0.0496 | rs6729185    | rs3769876  | lasso | 0.026154    | 3.27E-04    | 1.19094   | 2.34E-01 |
|                              | GALNT3   | 0.075  | rs11890028   | rs6717367  | lasso | 0.069706    | 7.21E-09    | -2.76521  | 5.69E-03 |
|                              | SCN9A    | 0.0974 | rs11890028   | rs13034090 | bslmm | 0.075715    | 1.62E-09    | 0.83388   | 4.04E-01 |
|                              | SCN7A    | 0.1072 | rs11890028   | rs3748895  | bslmm | 0.047216    | 1.86E-06    | -0.74225  | 4.58E-01 |
|                              | HIBCH    | 0.4269 | rs7590384    | rs16832572 | lasso | 0.336432    | 3.28E-42    | 3.13528   | 1.72E-03 |
|                              | INPP1    | 0.1398 | rs7590384    | rs1882891  | lasso | 0.133908    | 5.47E-16    | -1.85941  | 6.30E-02 |
|                              | MFSO6    | 0.0637 | rs7590384    | rs10931458 | enet  | 0.045795    | 2.63E-06    | 2.1394    | 3.24E-02 |
|                              | NAB1     | 0.0623 | rs7590384    | rs2293765  | lasso | 0.043763    | 4.33E-06    | 1.80349   | 7.13E-02 |
|                              | STAT4    | 0.0664 | rs7590384    | rs6738544  | lasso | 0.040593    | 9.42E-06    | 0.54052   | 5.89E-01 |

|          |         |        |            |            |       |          |          |          |          |
|----------|---------|--------|------------|------------|-------|----------|----------|----------|----------|
|          | GNPDA2  | 0.1597 | rs10155504 | rs12499960 | enet  | 0.116163 | 5.61E-14 | -0.60636 | 0.544274 |
|          | GABRA2  | 0.0517 | rs10517160 | rs9291283  | bslmm | 0.021086 | 1.14E-03 | -3.7157  | 0.000203 |
|          | TRIM36  | 0.0673 | rs4596374  | rs10059320 | bslmm | 1.50E-02 | 5.30E-03 | 0.2226   | 0.823843 |
|          | PGGT1B  | 0.1173 | rs4596374  | rs9326953  | enet  | 6.83E-02 | 1.03E-08 | -0.82271 | 0.410672 |
|          | CCDC112 | 0.0382 | rs4596374  | rs6870296  | blup  | 7.60E-03 | 3.54E-02 | 2.91427  | 0.003565 |
|          | PTPRK   | 0.0797 | rs6905941  | rs1508439  | bslmm | 0.048057 | 1.51E-06 | -3.66355 | 0.000249 |
| JME      | RNF40   | 0.1351 | rs1046276  | rs7187359  | enet  | 0.14652  | 1.93E-17 | 3.5323   | 4.12E-04 |
|          | SETD1A  | 0.0356 | rs1046276  | rs11150599 | bslmm | 0.01623  | 3.85E-03 | 5.6491   | 1.61E-08 |
|          | HSD3B7  | 0.0471 | rs1046276  | rs7197717  | lasso | 0.07076  | 5.54E-09 | 5.1649   | 2.41E-07 |
|          | ZNF646  | 0.0413 | rs1046276  | rs749671   | lasso | 0.04362  | 4.48E-06 | 4.9236   | 8.50E-07 |
|          | VKORC1  | 0.029  | rs1046276  | rs4889490  | lasso | 0.03383  | 4.94E-05 | -3.342   | 8.32E-04 |
|          | KAT8    | 0.0641 | rs1046276  | rs749767   | lasso | 0.07213  | 3.95E-09 | 3.302    | 9.60E-04 |
|          | PRSS36  | 0.1446 | rs1046276  | rs889555   | enet  | 0.11267  | 1.38E-13 | 4.5402   | 5.62E-06 |
|          | TRIM72  | 0.0815 | rs1046276  | rs4889640  | enet  | 0.04477  | 3.38E-06 | -2.7042  | 6.85E-03 |
|          | ITGAX   | 0.0475 | rs1046276  | rs8052139  | enet  | 0.0536   | 3.87E-07 | -3.3345  | 8.54E-04 |
| CAE      | VRK2    | 0.0677 | rs12185644 | rs11125739 | bslmm | 0.015528 | 4.59E-03 | 0.91249  | 0.36151  |
|          | FANCL   | 0.0611 | rs12185644 | rs11682175 | blup  | 0.029378 | 1.48E-04 | 3.47011  | 0.00052  |
|          | GTDC1   | 0.1455 | rs1346343  | rs10206546 | lasso | 0.125727 | 4.67E-15 | 0.432    | 0.66574  |
| Focal HS | PLCH1   | 0.3139 | rs13315001 | rs13100169 | lasso | 0.23371  | 4.54E-28 | 1.11632  | 0.26429  |
|          | SLC33A1 | 0.1634 | rs13315001 | rs382534   | bslmm | 0.15404  | 2.58E-18 | 0.15728  | 0.87503  |
|          | KCNAB1  | 0.062  | rs13315001 | rs1027915  | lasso | 0.02701  | 2.65E-04 | 0.96785  | 0.33312  |
|          | FAM184A | 0.2672 | rs9489521  | rs4945630  | bslmm | 0.210874 | 3.54E-25 | -0.23076 | 0.8175   |

**Supplementary Table 3: Transcriptome-wide association analysis (TWAS) to assess the association between epilepsy phenotypes with gene-expression, performed using RNA-sequencing data of dorsolateral prefrontal cortex tissue from the CommonMind Consortium. The TWAS was limited to the 146 genes that were mapped to genome-wide significant loci in their respective phenotypes. Gene-expression weights to calculate the TWAS statistic were available for 53 of these 146 genes. Significant TWAS correlations after Bonferroni correction ( $p < 0.05/53 = 0.00094$ ) are highlighted in red.**

| Name         | Cosine distance | Indications                                                                      | First licensed (year) | Number of studies | PMIDs                                                                                                                                                                                             | Number of unique models | Models                                  |
|--------------|-----------------|----------------------------------------------------------------------------------|-----------------------|-------------------|---------------------------------------------------------------------------------------------------------------------------------------------------------------------------------------------------|-------------------------|-----------------------------------------|
| Pimozide     | -0.61440782     | Schizophrenia                                                                    | 1984                  | 3                 | 2272645, 6141554, 7875556                                                                                                                                                                         | 4                       | PTZ, Electro, AUD, Other                |
| Progesterone | -0.612515285    | Infertility; premenstrual symptoms; post-natal depression; recurrent miscarriage | 1976                  | 17                | 1356068, 9657647, 9918575, 10725616, 11166716, 12009770, 12821382, 14636318, 14982969, 15571511, 15820338, 16085296, 16784731, 19840816, 19907717, 20804775, 22835430                             | 5                       | KA, PTZ, Electro, Kin, Other            |
| Clonidine    | -0.584639091    | Migraine; Tourette syndrome; hypertension; menopausal flushing; sedation         | 1974                  | 21                | 1486503, 1847879, 2508150, 2826214, 2848694, 2876688, 2885413, 2995952, 6104728, 6306699, 6504961, 6843298, 7160794, 7305545, 7938564, 10211593, 10372568, 17214976, 23756131, 24139618, 25765931 | 7                       | KA, Pilo, PTZ, Electro, AUD, Kin, Other |
| Fluvoxamine  | -0.565953681    | Depression; obsessive-compulsive disorder                                        | 1994                  | 1                 | 25590967                                                                                                                                                                                          | 1                       | PTZ                                     |
| Losartan     | -0.511120986    | Hypertension; heart failure; diabetic nephropathy                                | 1995                  | 7                 | 8923498, 10544388, 20533906, 21797110, 24146309, 24659129, 25456349                                                                                                                               | 3                       | KA, PTZ, Other                          |
| Amiodarone   | -0.509678023    | Arrhythmia                                                                       | 1985                  | 1                 | 19353751                                                                                                                                                                                          | 2                       | PTZ, Other                              |
| Sertraline   | -0.504973971    | Depression; obsessive-compulsive disorder;                                       | 1991                  | 2                 | 7582562, 8538363                                                                                                                                                                                  | 2                       | AUD, Other                              |

|               |              |                                                                                                                |      |    |                                                                                                             |   |                                |
|---------------|--------------|----------------------------------------------------------------------------------------------------------------|------|----|-------------------------------------------------------------------------------------------------------------|---|--------------------------------|
|               |              | panic disorder; post-traumatic stress disorder; social anxiety disorder                                        |      |    |                                                                                                             |   |                                |
| Haloperidol   | -0.501865349 | Schizophrenia                                                                                                  | 1967 | 1  | 7875556                                                                                                     | 1 | Other                          |
| Chloroquine   | -0.481150292 | Malaria; rheumatoid arthritis; lupus erythematosus                                                             | 1949 | 2  | 7816747, 26655695                                                                                           | 1 | PTZ                            |
| Rofecoxib     | -0.477826512 | Osteoarthritis; pain; dysmenorrhoea                                                                            | 1999 | 7  | 16671960, 16844276, 17139192, 17139446, 18054463, 18340407, 19907717                                        | 2 | KA, PTZ                        |
| coFlutamide   | -0.469883681 | Prostate cancer                                                                                                | 1989 | 2  | 10446327, 12752460                                                                                          | 3 | PTZ, Electro, Other            |
| Promethazine  | -0.469157198 | Nausea; vomiting; vertigo; labyrinthine disorders; motion sickness; allergy; urticaria; sedation               | 1951 | 2  | 1874553, 2905589                                                                                            | 1 | Electro                        |
| Tetracycline  | -0.466342012 | Acne vulgaris; rosacea                                                                                         | 1953 | 1  | 22579030                                                                                                    | 1 | Electro                        |
| Raloxifene    | -0.458846622 | Postmenopausal osteoporosis                                                                                    | 1997 | 1  | 25218046                                                                                                    | 1 | KA                             |
| Modafinil     | -0.457880158 | Narcolepsy                                                                                                     | 1998 | 2  | 17681557, 25869564                                                                                          | 2 | PTZ, Electro                   |
| Diazoxide     | -0.457875065 | Hypoglycaemia                                                                                                  | 1973 | 2  | 15488295, 19728004                                                                                          | 3 | Pilo, Kin, Other               |
| Amlodipine    | -0.451374469 | Hypertension; angina                                                                                           | 1992 | 4  | 1698518, 11218825, 11526962, 20593148                                                                       | 3 | Pilo, PTZ, Electro             |
| Sildenafil    | -0.447401021 | Pulmonary hypertension; erectile dysfunction                                                                   | 1998 | 3  | 20067503, 20508294, 23994662                                                                                | 2 | Electro, Kin                   |
| Verapamil     | -0.441081591 | Angina; hypertension; cluster headache; supraventricular arrhythmia                                            | 1981 | 12 | 1946038, 2279078, 2411508, 2450733, 2744396, 3393267, 3784769, 7681002, 8152336, 8156971, 8707372, 11218825 | 6 | KA, Pilo, PTZ, AUD, Kin, Other |
| Riluzole      | -0.438649286 | Amyotrophic lateral sclerosis                                                                                  | 1995 | 4  | 11070180, 11463511, 12457877, 20015615                                                                      | 4 | KA, Pilo, Kin, Other           |
| Nicardipine   | -0.43461414  | Angina; hypertension                                                                                           | 1988 | 5  | 7681002, 8152336, 8872866, 10608279, 11742591                                                               | 4 | KA, PTZ, Kin, Other            |
| Dexamethasone | -0.431661129 | Inflammatory and allergic disorders; congenital adrenal hyperplasia; cerebral oedema; croup; rheumatic disease | 1958 | 3  | 16445912, 21403895, 21464890                                                                                | 3 | KA, Pilo, Kin                  |
| Bupropion     | -0.429076912 | Depression; smoking cessation                                                                                  | 1985 | 3  | 15363958, 21962757, 23770308                                                                                | 3 | KA, PTZ, Electro               |
| Doxepin       | -0.420870706 | Depression; pruritus                                                                                           | 1969 | 2  | 1456842, 19443935                                                                                           | 3 | PTZ, Electro, Other            |
| Allopurinol   | -0.420355463 | Gout; renal stones                                                                                             | 1966 | 1  | 26774005                                                                                                    | 1 | KA                             |
| Methotrexate  | -0.409519203 | Rheumatoid arthritis; crohn's disease; psoriasis                                                               | 1953 | 1  | 1448429                                                                                                     | 1 | PTZ                            |
| Thalidomide   | -0.405694736 | Malignant disease; immunosuppression                                                                           | 1998 | 3  | 17449064, 21592729, 24735834                                                                                | 2 | PTZ, Kin                       |
| Triamterene   | -0.40050826  | Oedema                                                                                                         | 1964 | 1  | 26855365                                                                                                    | 2 | PTZ, Electro                   |
| Tacrolimus    | -0.392643295 | Organ rejection; atopic eczema                                                                                 | 1994 | 1  | 25580467                                                                                                    | 1 | Other                          |
| Pheniramine   | -0.387844428 | Hay fever; urticaria; allergic conjunctivitis                                                                  | 1994 | 1  | 1874553                                                                                                     | 1 | Electro                        |

**Supplementary Table 4: Examples of significant drug repurposing candidates identified through connectivity mapping analysis of all epilepsy GWAS-imputed transcriptome. 30 drugs predicted to significantly reverse epilepsy-associated gene expression changes. These drugs have published evidence of antiepileptic efficacy in animal models and are already licensed for the treatment of other human diseases. The drugs are listed in order of decreasing (less negative) cosine distance values. A higher (more negative) cosine distance indicates greater likelihood of antiepileptic efficacy. Animal model evidence and drug indications and use data were extracted from the Prescribable Drugs with Efficacy in Experimental Epilepsies (PDE3) database. AUD: audiogenic; electro: electroshock; KA: kainic acid; kin: kindling; pilo: pilocarpine; PTZ: pentylenetetrazol.**

|                            | Source of summary statistics            | Sample size | All epilepsy      | Focal epilepsy     | Genetic generalized epilepsy |
|----------------------------|-----------------------------------------|-------------|-------------------|--------------------|------------------------------|
| <b>Headache</b>            | Meng et al., 2018 <sup>1</sup>          | n=223773    | Rg=0.432; p=0.033 | Rg=0.213; p=0.0015 | Rg=0.083; p=0.049            |
| <b>Alzheimer's Disease</b> | Lambert et al., 2013 <sup>2</sup>       | n=74046     | Rg=0.16; p=0.21   | Rg=0.289; p=0.33   | Rg=0.042; p=0.615            |
| <b>Parkinson's Disease</b> | Simón-Sánchez et al., 2009 <sup>3</sup> | n=5691      | Rg=0.089; p=0.347 | Rg=0.163; p=0.351  | Rg=0.004; p=0.934            |

|                              |                                         |          |                      |                    |                     |
|------------------------------|-----------------------------------------|----------|----------------------|--------------------|---------------------|
| Ischaemic stroke             | ISGC, 2016 <sup>4</sup>                 | n=49323  | Rg=0.4678; p=0.092   | Rg=0.3172; p=0.014 | Rg=0.1027; p=0.306  |
| Intracranial aneurysm        | van't Hof et al., 2016 <sup>5</sup>     | n=5821   | Rg=0.735; p=0.223    | Rg=0.279; p=0.234  | Rg=-0.059; p=0.693  |
| Febrile Seizures*            | Feenstra et al., 2014 <sup>6</sup>      | n=6117   | Rg=0.085; p=0.785    | Rg=0.169; p=0.29   | Rg=0.144; p=0.195   |
| Migraine with aura**         | Gormley et al., 2016 <sup>7</sup>       | n=6332   | Rg=0.259; p=0.274    | Rg=0.172; p=0.17   | Rg=0.171; p=0.07    |
| Migraine without aura**      | Gormley et al., 2016 <sup>7</sup>       | n=8348   | Rg=0.219; p=0.333    | Rg=0.07; p=0.493   | Rg=-0.025; p=0.723  |
| Schizophrenia                | Ripke et al., 2014 <sup>8</sup>         | n=150064 | Rg=0.0597; p=0.263   | Rg=0.111; p=0.459  | Rg=0.009; p=0.842   |
| Autism spectrum disorder     | Grove et al., 2017 (Biorxiv)            | n=46350  | Rg=-0.294; p=0.093   | Rg=-0.149; p=0.096 | Rg=-0.059; p=0.349  |
| Bipolar disorder             | Sklar et al., 2011 <sup>9</sup>         | n=16731  | Rg=-0.047; p=0.521   | Rg=-0.066; p=0.633 | Rg=-0.023; p=0.724  |
| Major depressive disorder    | Ripke et al., 2013 <sup>10</sup>        | n=18759  | Rg=-0.039; p=0.721   | Rg=-0.039; p=0.858 | Rg=-0.152; p=0.086  |
| ADHD                         | Middeldorp et al., 2016 <sup>11</sup>   | n=17666  | Rg=0.31; p=0.069     | Rg=0.4588; p=0.176 | Rg=0.214; p=0.120   |
| Systemic lupus erythematosus | Bentham et al., 2015 <sup>12</sup>      | n=23210  | Rg=0.331; p=0.003    | Rg=0.459; p=0.059  | Rg=0.234; p=0.003   |
| Multiple sclerosis           | Sawcer et al., 2011 <sup>13</sup>       | n=27148  | Rg=0.235; p=-0.227   | Rg=0.335; p=0.354  | Rg=0.104; p=0.399   |
| Cognitive ability            | Sniers et al., 2017 <sup>14</sup>       | n=78308  | Rg=-0.331; p=1.58E-6 | Rg=-0.534; p=0.004 | Rg=-0.181; p=3.0E-4 |
| Neuroticism                  | van den Berg et al., 2014 <sup>15</sup> | n=160958 | Rg=0.130; p=0.381    | Rg=-0.052; p=0.875 | Rg=0.063; p=0.22    |
| Openness to experience       | de Moor et al., 2012 <sup>16</sup>      | n=17375  | Rg=0.0537; p=0.684   | Rg=0.252; p=0.370  | Rg=-0.0836; p=0.432 |
| Conscientiousness            | de Moor et al., 2012 <sup>16</sup>      | n=17375  | Rg=0.0728; p=0.6844  | Rg=0.193; p=0.591  | Rg=0.0011; p=0.994  |

Supplementary Table 5: The genetic correlations of epilepsy with other phenotypes, *calculated using LD-score regression*. Rg: genetic correlation coefficient. \*Combined MMR-related and MMR-unrelated febrile seizures. \*\*Migraine results without 23andMe data

| Contributor         | Ancestry             | Description | n     | Platform Chip              | Institutional Review Board                                                                                                                                                                                                                                                                                                                                                                                                                                                                                                                                                                                          |
|---------------------|----------------------|-------------|-------|----------------------------|---------------------------------------------------------------------------------------------------------------------------------------------------------------------------------------------------------------------------------------------------------------------------------------------------------------------------------------------------------------------------------------------------------------------------------------------------------------------------------------------------------------------------------------------------------------------------------------------------------------------|
| BRAINN/UNICAMP      | Brazilian (Afr&Cauc) | Case        | 177   | Affymetrix 6.0             | Research Ethics Committee at the University of Campinas (UNICAMP), Brazil                                                                                                                                                                                                                                                                                                                                                                                                                                                                                                                                           |
|                     |                      | Control     | 163   |                            |                                                                                                                                                                                                                                                                                                                                                                                                                                                                                                                                                                                                                     |
| Philadelphia Cohort | US (Afr&Cauc)        | Case        | 1,734 | Illumina 550, Omni-Express | Thomas Jefferson University Hospital Philadelphia PA USA;<br>The Children's Hospital of Philadelphia, Philadelphia PA USA;<br>The University of Pennsylvania, Philadelphia PA USA;<br>The University of Cincinnati, Cincinnati Ohio USA;<br>Nationwide Children's Hospital, Columbus Ohio, USA;<br>Beth Israel Deaconess Medical Center, Boston MA;<br>The University of Montreal, Montreal Quebec, CA                                                                                                                                                                                                              |
|                     |                      | Control     | 9,337 |                            |                                                                                                                                                                                                                                                                                                                                                                                                                                                                                                                                                                                                                     |
| Duke University     | US (Cauc)            | Case        | 777   | Illumina 610               | Duke University Institutional Review Board, Durham, NC, USA                                                                                                                                                                                                                                                                                                                                                                                                                                                                                                                                                         |
| EPGP                | US (Cauc)            | Case        | 1,298 | Illumina HumanCore         | Montefiore Medical Center Institutional Review Board;<br>Hospital General de Agudos J.M.Ramos Mejia Comité de Ética en Investigación;<br>Children's Hospital Boston Office of Clinical Investigation;<br>University of Pittsburgh Institutional Review Board;<br>Children's Hospital of Philadelphia Committees for Protection of Human Subjects;<br>Cincinnati Children's Hospital Medical Center Institutional Review Board;<br>Cleveland Clinic Institutional Review Board;<br>Columbia University Medical Center;<br>Colorado Multiple Institutional IRB Board;<br>Emory University Institutional Review Board; |

|                              |             |         |       |                       |                                                                                                                                                                                                                                                                                                                                                                                                                                                                                                                                                                                                                                                                                                                                                                                                                                                                                                                                                                                                                                                                                                                              |
|------------------------------|-------------|---------|-------|-----------------------|------------------------------------------------------------------------------------------------------------------------------------------------------------------------------------------------------------------------------------------------------------------------------------------------------------------------------------------------------------------------------------------------------------------------------------------------------------------------------------------------------------------------------------------------------------------------------------------------------------------------------------------------------------------------------------------------------------------------------------------------------------------------------------------------------------------------------------------------------------------------------------------------------------------------------------------------------------------------------------------------------------------------------------------------------------------------------------------------------------------------------|
|                              |             |         |       |                       | University of Texas Health Science Center at Houston Committee for the Protection of Human Subjects; Jefferson University Institutional Review Board; Johns Hopkins Medicine Institutional Review Boards; Mayo Clinic Institutional Review Boards; Austin Health Human Research Ethics Committee; University of Michigan Institutional Review Board; McGill University Health Centre Research Ethics Board; Louisiana Health Sciences Center New Orleans Institutional Review Board; Upper South B Regional Ethics Committee, Ministry of Health; NYU School of Medicine Institutional Review Board; Rush University Medical Center Institutional Review Board; Seattle Children's Hospital Institutional Review Board; Saint Barnabas Medical Center Institutional Review Board; University of Alabama at Birmingham Institutional Review Board; University of California, San Francisco Committee on Human Research; Vanderbilt University Institutional Review Board; University of Virginia Institutional Review Board for Health Sciences Research; Washington University in St. Louis Human Research Protection Office |
| EPICURE SP1                  | NW European | Case    | 1,495 | Affymetrix 6.0        | Ethics Committee at the Medical Faculty of the Eberhard-Karls University and the University Hospital Tübingen; University Hospital of Bonn Ethical Committee; Medical Ethical Board of the University Medical Center Utrecht, The Netherlands                                                                                                                                                                                                                                                                                                                                                                                                                                                                                                                                                                                                                                                                                                                                                                                                                                                                                |
| EPICURE SP5                  | NW European | Case    | 788   | Illumina Omni-Express | Ethics Committee at the Medical Faculty of the Eberhard-Karls University and the University Hospital Tübingen; University Hospital of Bonn Ethical Committee; Medical Ethical Board of the University Medical Center Utrecht, The Netherlands                                                                                                                                                                                                                                                                                                                                                                                                                                                                                                                                                                                                                                                                                                                                                                                                                                                                                |
| EpiPGX                       | NW European | Case    | 5,031 | Illumina Omni-Express | Joint Research Ethics Committee, National Hospital for Neurology and Neurosurgery and Institute of Neurology, 00/N081 NRES Committee London - Camden & Islington; North West 3 Research Ethics Committee in April 2010 (ref: 10/H1002/5); North-West Multicentre Research Ethics Committee (ref: MREC 02/8/45); West Ethics Committee, North Glasgow University Hospitals NHS Trust (ref: 02/119(2); METC 09-352K: The Genetics of epilepsy; Beaumont Hospital Ethics Committee (study code 02/44; University Hospital of Bonn Ethical Committee                                                                                                                                                                                                                                                                                                                                                                                                                                                                                                                                                                             |
| GenEpa                       | Finnish     | Case    | 422   | Illumina 610          | Suomen valtakunnallinen lääketieteellinen tutkimuseettinen toimikunta TUKIJA                                                                                                                                                                                                                                                                                                                                                                                                                                                                                                                                                                                                                                                                                                                                                                                                                                                                                                                                                                                                                                                 |
|                              |             | Control | 293   |                       |                                                                                                                                                                                                                                                                                                                                                                                                                                                                                                                                                                                                                                                                                                                                                                                                                                                                                                                                                                                                                                                                                                                              |
| German controls              | German      | Control | 1,317 | Illumina OmniExpress  | University Hospital of Bonn Ethical Committee (040/07)                                                                                                                                                                                                                                                                                                                                                                                                                                                                                                                                                                                                                                                                                                                                                                                                                                                                                                                                                                                                                                                                       |
| Helsinki Birth Cohort        | Finnish     | Control | 1,586 | Illumina 610          | Coordinating Ethics Committee of The Hospital District of Helsinki and Uusimaa                                                                                                                                                                                                                                                                                                                                                                                                                                                                                                                                                                                                                                                                                                                                                                                                                                                                                                                                                                                                                                               |
| KORA                         | German      | Control | 1,331 | Affymetrix 6.0        | Ethics Committee of the Bavarian Medical Association (Bayerische Landesärztekammer)                                                                                                                                                                                                                                                                                                                                                                                                                                                                                                                                                                                                                                                                                                                                                                                                                                                                                                                                                                                                                                          |
| Imperial-Liverpool-Melbourne | British     | Case    | 1,294 | Illumina Omni-Express | North West Multi-centre Research Ethics Committee, Manchester, UK                                                                                                                                                                                                                                                                                                                                                                                                                                                                                                                                                                                                                                                                                                                                                                                                                                                                                                                                                                                                                                                            |
| Northwest-Europeans          | Belgian     | Control | 1,622 | Illumina HH300        | The Erasmus-ULB Ethics Committee, Brussels                                                                                                                                                                                                                                                                                                                                                                                                                                                                                                                                                                                                                                                                                                                                                                                                                                                                                                                                                                                                                                                                                   |
| POBI                         | British     | Control | 2,706 | Illumina 1.2M         | NRES Committee, Yorkshire and the Humber – Leeds West, UK (Reference 05/Q1205/35)                                                                                                                                                                                                                                                                                                                                                                                                                                                                                                                                                                                                                                                                                                                                                                                                                                                                                                                                                                                                                                            |
| PopGen                       | NW European | Control | 1,062 | Affymetrix 6.0        | The ethics commission of the Faculty of Medicine of the Christian-Albrechts University of Kiel (CAU)                                                                                                                                                                                                                                                                                                                                                                                                                                                                                                                                                                                                                                                                                                                                                                                                                                                                                                                                                                                                                         |
| RCSI                         | Irish       | Case    | 645   | Illumina 610          | Beaumont Hospital Ethics Committee; St James Hospital and Adelaide and Meath Hospital Research Ethics Committee                                                                                                                                                                                                                                                                                                                                                                                                                                                                                                                                                                                                                                                                                                                                                                                                                                                                                                                                                                                                              |

|                            |                   |         |       |                            |                                                                                                             |
|----------------------------|-------------------|---------|-------|----------------------------|-------------------------------------------------------------------------------------------------------------|
| Royal Melbourne Hospital   | Australian (Cauc) | Case    | 348   | Illumina 610, Omni-Express | Melbourne Health Human Research and Ethics Committee                                                        |
| Trinity Student Study      | Irish             | Control | 2,232 | Illumina Omni1-Quad        | Dublin Federated Hospitals Research Ethics Committee                                                        |
| UCL                        | British           | Case    | 1,051 | Illumina 610               | NRES Committee London – Camden & Islington                                                                  |
| UK National Blood Service  | British           | Control | 2,501 | Illumina 1.2M              | NRES Committee London – Camden & Islington                                                                  |
| ULB                        | Belgian           | Case    | 539   | Illumina 610               | The Erasmus-ULB Ethics Committee, Brussels                                                                  |
| University of Bonn         | German            | Case    | 284   | Affymetrix 6.0             | University Hospital of Bonn Ethical Committee (040/07)                                                      |
| University of Hong Kong    | Han Chinese       | Case    | 533   | Illumina 550, 610          | The Joint Chinese University of Hong Kong – New Territories East Cluster Clinical Research Ethics Committee |
|                            |                   | Control | 2,875 |                            |                                                                                                             |
| Wellcome 1958 Birth Cohort | British           | Control | 2,699 | Illumina 1.2M              | North West – Haydock Research Ethics Committee; NRES Committee London – Camden & Islington                  |

Supplementary Table 6: Details of participating cohorts. *Numbers of cases and controls are after quality control filtering.*

| Phenotype             | Ethnicity        | $\lambda$ | $\lambda_{1000}$ | Mean $\chi^2$ | LDSC intercept |
|-----------------------|------------------|-----------|------------------|---------------|----------------|
| All epilepsy          | Caucasian        | 1.2514    | 1.0138           | 1.175         | 1.151          |
|                       | African-American | 0.9977    | 0.9917           | 0.995         | 1.0122         |
|                       | Asian            | 1.045     | 1.05             | 1.047         | 1.0138         |
| Focal epilepsy        | Caucasian        | 1.197     | 1.0176           | 1.283         | 1.18           |
|                       | African-American | 0.9977    | 0.9862           | 0.994         | 0.9987         |
|                       | Asian            | 1.045     | 1.0537           | 1.04          | 1.0231         |
| Generalized epilepsy  | Caucasian        | 1.2514    | 1.04255          | 1.296         | 1.098          |
|                       | African-American | 0.9977    | 0.9807           | 0.994         | 1.0174         |
| CAE                   | Caucasian        | 1.094     | 1.0636           | 1.136         | 1.068          |
| JAE                   | Caucasian        | 1.094     | 1.11648          | 1.085         | 1.037          |
| JME                   | Caucasian        | 1.1447    | 1.06644          | 1.156         | 1.05           |
| GTCS alone            | Caucasian        | 1.045     | 1.1015           | 1.063         | 1.025          |
| Focal-HS              | Caucasian        | 1.094     | 1.0695           | 1.115         | 1.078          |
| Focal, other lesion   | Caucasian        | 1.094     | 1.0203           | 1.092         | 1.094          |
| Focal lesion negative | Caucasian        | 1.094     | 1.0209           | 1.091         | 1.077          |

Supplementary Table 7: Estimation of inflation factor and the LD-score regression intercept stratified by ethnicity and phenotype.  $\lambda_{GC}$ : genomic inflation factor;  $\lambda_{1000}$ : genomic inflation factor corrected for an equivalent study of 1000 cases and 1000 controls.

|         |         |        |        |        |       |        |          |          |         |       |
|---------|---------|--------|--------|--------|-------|--------|----------|----------|---------|-------|
| ADSL    | CHRNA2  | CSTB   | GABRA1 | GRIN2B | KCNQ2 | NHLRC1 | PPT1     | SCN9A    | STX1B   | WVVOX |
| ALDH7A1 | CHRNA4  | CTSD   | GABRB2 | HCN1   | KCNQ3 | NR2F1  | PRICKLE1 | SIK1     | STXBP1  | ZEB2  |
| ALG13   | CHRNA7  | DEPDC5 | GABRB3 | HNRNPU | KCNT1 | NRXN1  | PRICKLE2 | SLC13A5  | SYNGAP1 |       |
| ARHGEF9 | CHRN2   | DNAJC5 | GABRG2 | IQSEC2 | KCTD7 | PCDH19 | PRRT2    | SLC25A22 | TBC1D24 |       |
| ARX     | CLN2    | DNM1   | GAMT   | KANSL1 | LGI1  | PIGA   | QARS     | SLC2A1   | TCF4    |       |
| ATP1A2  | CLN3    | DYRK1A | GATM   | KCNA2  | MAGI2 | PIGO   | SCARB2   | SLC35A2  | TPP1    |       |
| ATP6AP2 | CLN5    | EEF1A2 | GNAO1  | KCNB1  | MBD5  | PIGV   | SCN1A    | SLC6A1   | TSC1    |       |
| CACNA1A | CLN6    | EPM2A  | GOSR2  | KCNK1  | MECP2 | PNKP   | SCN1B    | SLC6A8   | TSC2    |       |
| CDKL5   | CLN8    | FOLR1  | GRIN1  | KCNJ10 | MEF2C | PNPO   | SCN2A    | SLC9A6   | UBE3A   |       |
| CHD2    | CNTNAP2 | FOXG1  | GRIN2A | KCNMA1 | MFSD8 | POLG   | SCN8A    | SPTAN1   | WDR45   |       |

Supplementary Table 8: List of selected monogenic epilepsy genes that were tested for enrichment in our GWAS. We supplemented the list of 43 known dominant epilepsy genes (Epi4K Consortium, 2017) with an additional 59 monogenic epilepsy genes from the GeneDX comprehensive epilepsy panel ([www.genedx.com](http://www.genedx.com)).



|           | Number of Datasets | Dataset names |            |            |            |           |       |
|-----------|--------------------|---------------|------------|------------|------------|-----------|-------|
| BCL11A    | 6                  | Hawrylycz     | Miller     | Kang       | Hernandez  | Trabzuni  | Zhang |
| GJA1      | 6                  | Hawrylycz     | Miller     | Kang       | Colantuoni | Hernandez | Zhang |
| GLS       | 5                  | Hawrylycz     | Miller     | Colantuoni | Hernandez  | Trabzuni  |       |
| GTDC1     | 5                  | Hawrylycz     | Miller     | Kang       | Hernandez  | Zhang     |       |
| CSRP3     | 4                  | Hawrylycz     | Miller     | Kang       | Trabzuni   |           |       |
| PRSS36    | 4                  | Hawrylycz     | Kang       | Colantuoni | Trabzuni   |           |       |
| PTPRK     | 4                  | Hawrylycz     | Kang       | Hernandez  | Zhang      |           |       |
| VKORC1    | 4                  | Miller        | Hernandez  | Trabzuni   | Zhang      |           |       |
| ATXN1     | 3                  | Hawrylycz     | Colantuoni | Hernandez  |            |           |       |
| CTF1      | 3                  | Kang          | Colantuoni | Trabzuni   |            |           |       |
| FBRS      | 3                  | Hawrylycz     | Miller     | Colantuoni |            |           |       |
| GABRA2    | 3                  | Hawrylycz     | Miller     | Colantuoni |            |           |       |
| GABRG1    | 3                  | Hawrylycz     | Miller     | Colantuoni |            |           |       |
| KCNAB1    | 3                  | Miller        | Colantuoni | Zhang      |            |           |       |
| LRRC46    | 3                  | Hawrylycz     | Kang       | Colantuoni |            |           |       |
| PRSS8     | 3                  | Hawrylycz     | Miller     | Kang       |            |           |       |
| PYDC1     | 3                  | Hawrylycz     | Hernandez  | Zhang      |            |           |       |
| ZNF646    | 3                  | Miller        | Colantuoni | Trabzuni   |            |           |       |
| BCKDK     | 2                  | Miller        | Zhang      |            |            |           |       |
| CBX1      | 2                  | Hawrylycz     | Miller     |            |            |           |       |
| FBXL19    | 2                  | Hawrylycz     | Miller     |            |            |           |       |
| FKBP1B    | 2                  | Miller        | Zhang      |            |            |           |       |
| HOXB13    | 2                  | Hawrylycz     | Colantuoni |            |            |           |       |
| HOXB5     | 2                  | Kang          | Colantuoni |            |            |           |       |
| HOXB9     | 2                  | Kang          | Trabzuni   |            |            |           |       |
| HSD3B7    | 2                  | Trabzuni      | Zhang      |            |            |           |       |
| KRTAP19-1 | 2                  | Hawrylycz     | Miller     |            |            |           |       |
| KRTAP8-1  | 2                  | Hawrylycz     | Miller     |            |            |           |       |
| MRPL10    | 2                  | Miller        | Colantuoni |            |            |           |       |
| OSBPL7    | 2                  | Colantuoni    | Trabzuni   |            |            |           |       |
| PCDH7     | 2                  | Colantuoni    | Hernandez  |            |            |           |       |
| PRR14     | 2                  | Hernandez     | Trabzuni   |            |            |           |       |
| PYCARD    | 2                  | Miller        | Hernandez  |            |            |           |       |
| SCN3A     | 2                  | Hawrylycz     | Kang       |            |            |           |       |
| SCRN2     | 2                  | Trabzuni      | Zhang      |            |            |           |       |
| SP6       | 2                  | Hawrylycz     | Kang       |            |            |           |       |
| STAT4     | 2                  | Colantuoni    | Hernandez  |            |            |           |       |
| TBKB1     | 2                  | Hawrylycz     | Miller     |            |            |           |       |
| TBX21     | 2                  | Kang          | Trabzuni   |            |            |           |       |
| TP53I3    | 2                  | Hawrylycz     | Miller     |            |            |           |       |
| VRK2      | 2                  | Hawrylycz     | Trabzuni   |            |            |           |       |
| ZNF629    | 2                  | Hawrylycz     | Zhang      |            |            |           |       |
| ZNF689    | 2                  | Kang          | Trabzuni   |            |            |           |       |
| ADCY7     | 1                  | Zhang         |            |            |            |           |       |

|           |   |            |  |  |  |  |  |
|-----------|---|------------|--|--|--|--|--|
| BRD7      | 1 | Hawrylycz  |  |  |  |  |  |
| CCDC112   | 1 | Miller     |  |  |  |  |  |
| CDK5RAP3  | 1 | Hernandez  |  |  |  |  |  |
| COPZ2     | 1 | Zhang      |  |  |  |  |  |
| GNPDA2    | 1 | Zhang      |  |  |  |  |  |
| GRIK1     | 1 | Miller     |  |  |  |  |  |
| HIBCH     | 1 | Zhang      |  |  |  |  |  |
| HOXB1     | 1 | Kang       |  |  |  |  |  |
| HOXB2     | 1 | Colantuoni |  |  |  |  |  |
| HOXB3     | 1 | Kang       |  |  |  |  |  |
| HOXB4     | 1 | Kang       |  |  |  |  |  |
| HOXB7     | 1 | Hawrylycz  |  |  |  |  |  |
| HOXB8     | 1 | Kang       |  |  |  |  |  |
| KAT8      | 1 | Miller     |  |  |  |  |  |
| KCNN2     | 1 | Colantuoni |  |  |  |  |  |
| KLHL29    | 1 | Hernandez  |  |  |  |  |  |
| KRTAP13-3 | 1 | Colantuoni |  |  |  |  |  |
| KRTAP15-1 | 1 | Colantuoni |  |  |  |  |  |
| KRTAP19-6 | 1 | Colantuoni |  |  |  |  |  |
| KRTAP19-7 | 1 | Colantuoni |  |  |  |  |  |
| KRTAP21-1 | 1 | Zhang      |  |  |  |  |  |
| KRTAP21-2 | 1 | Kang       |  |  |  |  |  |
| KRTAP6-3  | 1 | Hawrylycz  |  |  |  |  |  |
| MFSD2B    | 1 | Hawrylycz  |  |  |  |  |  |
| MFSD6     | 1 | Hernandez  |  |  |  |  |  |
| NAB1      | 1 | Hernandez  |  |  |  |  |  |
| NFE2L1    | 1 | Hernandez  |  |  |  |  |  |
| NPEPPS    | 1 | Miller     |  |  |  |  |  |
| PAPD5     | 1 | Miller     |  |  |  |  |  |
| PLCH1     | 1 | Zhang      |  |  |  |  |  |
| RNF40     | 1 | Zhang      |  |  |  |  |  |
| SCN7A     | 1 | Miller     |  |  |  |  |  |
| SETD1A    | 1 | Hernandez  |  |  |  |  |  |
| SLC33A1   | 1 | Kang       |  |  |  |  |  |
| SNX11     | 1 | Kang       |  |  |  |  |  |
| STX4      | 1 | Hernandez  |  |  |  |  |  |
| THEMIS    | 1 | Hawrylycz  |  |  |  |  |  |
| TRIM36    | 1 | Hernandez  |  |  |  |  |  |
| TRIM72    | 1 | Zhang      |  |  |  |  |  |
| ZNF423    | 1 | Kang       |  |  |  |  |  |
| ZNF668    | 1 | Trabzuni   |  |  |  |  |  |

Supplementary Table 9: brain-coX in silico gene co-expression prioritization results with 146 candidate epilepsy genes identified from the GWAS. 85 genes were prioritised in at least one brain gene expression datasets. First author name of paper describing relevant datasets for each gene are given as columns.

|        |        |        |          |        |        |         |         |
|--------|--------|--------|----------|--------|--------|---------|---------|
| CA12   | SCN7A  | SCN10A | CACNA1G  | GRIA3  | GRIK1  | GABRQ   | GRIN2C  |
| CA1    | SCN5A  | GABRA1 | CACNA1H  | GRIA4  | GABRA4 | ALDH5A1 | GRIN3A  |
| CA2    | CHRNA2 | GABRG2 | CACNA1I  | GABRB1 | GABRE  | ABAT    | CHRNA4  |
| CA4    | SCN9A  | GABRA5 | CACNA2D1 | GABRB3 | GRIK2  | GRIN2D  | CHRNA7  |
| CHRNA4 | SCN2A  | GABRA3 | CACNA1B  | GABRB2 | GRIK3  | GRIN3B  | KIT     |
| SLC6A4 | SCN3A  | GABRA2 | SV2A     | SLC6A1 | GRIK4  | GRIN1   | PDGFRA  |
| SCN1A  | SCN11A | GABRG1 | GRIA1    | GABRP  | GABRA6 | GRIN2A  | PDGFRB  |
| SCN4A  | SCN8A  | GABRG3 | GRIA2    | GABRD  | GRIK5  | GRIN2B  | SLC18A2 |

Supplementary Table 10: List of genes that are targets of currently used anti-epileptic drugs which were tested for enrichment in our GWAS. We compiled the list of drug target genes from (Santos et al., 2017), supplemented with additional FDA & EMA licensed AEDs.

| Phenotype                | Cases  | Controls | P<br>(proportion<br>of cases in<br>sample) | K (disease<br>prevalence) | Z       | $h_o^2$ (LDAC<br>observed<br>heritability) | $h_L^2$ : liability scale<br>heritability (95%<br>CI) | $h_L^2$ : liability<br>scale<br>heritability<br>modeled with<br>half<br>prevalence<br>(K/2) | $h_L^2$ : liability<br>scale<br>heritability<br>modeled with<br>double<br>prevalence<br>(K*2) |
|--------------------------|--------|----------|--------------------------------------------|---------------------------|---------|--------------------------------------------|-------------------------------------------------------|---------------------------------------------------------------------------------------------|-----------------------------------------------------------------------------------------------|
| All epilepsy             | 1,4534 | 24,218   | 0.3751                                     | 0.005                     | 0.01446 | 0.191586                                   | 0.097 (0.091 - 0.11)                                  | 0.084                                                                                       | 0.11                                                                                          |
| Focal epilepsy           | 9,095  | 24,218   | 0.2730                                     | 0.003                     | 0.00915 | 0.17111                                    | 0.092 (0.084 - 0.10)                                  | 0.082                                                                                       | 0.11                                                                                          |
| Generalized<br>epilepsy  | 3,708  | 24,218   | 0.1328                                     | 0.002                     | 0.00634 | 0.37258                                    | 0.32 (0.30 - 0.35)                                    | 0.28                                                                                        | 0.37                                                                                          |
| CAE                      | 636    | 24,218   | 0.0256                                     | 0.00035                   | 0.00128 | 0.194                                      | 0.58 (0.38 - 0.78)                                    | 0.53                                                                                        | 0.64                                                                                          |
| JAE                      | 273    | 24,218   | 0.0111                                     | 0.00015                   | 0.00058 | 0.121                                      | 0.74 (0.37 - 1.11)                                    | 0.67                                                                                        | 0.81                                                                                          |
| JME                      | 1,177  | 24,218   | 0.0463                                     | 0.00015                   | 0.00058 | 0.30413                                    | 0.46 (0.33 - 0.60)                                    | 0.42                                                                                        | 0.51                                                                                          |
| GTCS alone               | 225    | 24,218   | 0.0092                                     | 0.0002                    | 0.00076 | 0.140328                                   | 1.07 (0.61 - 1.54)                                    | 0.98                                                                                        | 1.18                                                                                          |
| Focal lesion<br>negative | 2,660  | 24,218   | 0.0990                                     | 0.0009                    | 0.00306 | 0.074626                                   | 0.072 (0.017 - 0.13)                                  | 0.065                                                                                       | 0.082                                                                                         |
| Focal HS                 | 709    | 24,218   | 0.0284                                     | 0.00075                   | 0.00258 | 0.059077                                   | 0.18 (0.0 - 0.36)                                     | 0.16                                                                                        | 0.20                                                                                          |
| Focal, other<br>lesion   | 2,751  | 24,218   | 0.1020                                     | 0.00135                   | 0.00443 | 0.04024                                    | 0.040 (0.0 - 0.091)                                   | 0.036                                                                                       | 0.046                                                                                         |

Supplementary Table 11: SNP-based heritabilities computed with LDAK and converted to liability scale.

| Phenotype                    | LDAK    |                      | BOLT-REML |                     | LDSC    |                       |
|------------------------------|---------|----------------------|-----------|---------------------|---------|-----------------------|
|                              | $h_o^2$ | $h_L^2$ (L95-U95)    | $h_o^2$   | $h_L^2$ (L95-U95)   | $h_o^2$ | $h_L^2$ (L95-U95)     |
| All epilepsy                 | 0.192   | 0.097 (0.091-0.102)  | 0.227     | 0.115 (0.107-0.122) | 0.1245  | 0.063 (0.043-0.082)   |
| Focal epilepsy               | 0.171   | 0.092 (0.083-0.101)  | 0.172     | 0.093 (0.083-0.102) | 0.0324  | 0.017 (-0.004-0.039)  |
| Genetic generalized epilepsy | 0.373   | 0.321 (0.296-0.345)  | 0.315     | 0.271 (0.253-0.288) | 0.3217  | 0.277 (0.225-0.329)   |
| CAE                          | 0.194   | 0.584 (0.385-0.784)  | 0.126     | 0.379 (0.321-0.438) | 0.1019  | 0.307 (0.164-0.449)   |
| JAE                          | 0.121   | 0.736 (0.365-1.107)  | 0.055     | 0.332 (0.226-0.439) | 0.0584  | 0.355 (0.125-0.585)   |
| JME                          | 0.304   | 0.462 (0.326-0.596)  | 0.173     | 0.263 (0.232-0.294) | 0.1885  | 0.286 (0.199-0.373)   |
| GTCS alone                   | 0.14    | 1.071 (0.607-1.535)  | 0.073     | 0.558 (0.416-0.700) | 0.0735  | 0.561 (0.248-0.874)   |
| Focal lesion negative        | 0.075   | 0.072 (0.017-0.128)  | 0.091     | 0.089 (0.072-0.105) | 0.0239  | 0.023 (-0.015-0.061)  |
| Focal HS                     | 0.059   | 0.18 (-0.004-0.363)  | 0.161     | 0.491 (0.431-0.551) | 0.0414  | 0.126 (0.036-0.216)   |
| Focal, other lesion          | 0.04    | 0.041 (-0.009-0.091) | 0.088     | 0.089 (0.072-0.106) | -0.0021 | -0.002 (-0.043-0.039) |

Supplementary Table 12: Comparative SNP-based heritability estimates computed by LDAK, BOLT-REML and LDSC.

$h_o^2$ : Observed SNP-based heritability.  $h_L^2$ : SNP-based heritability converted to liability scale.

# Supplementary Figures

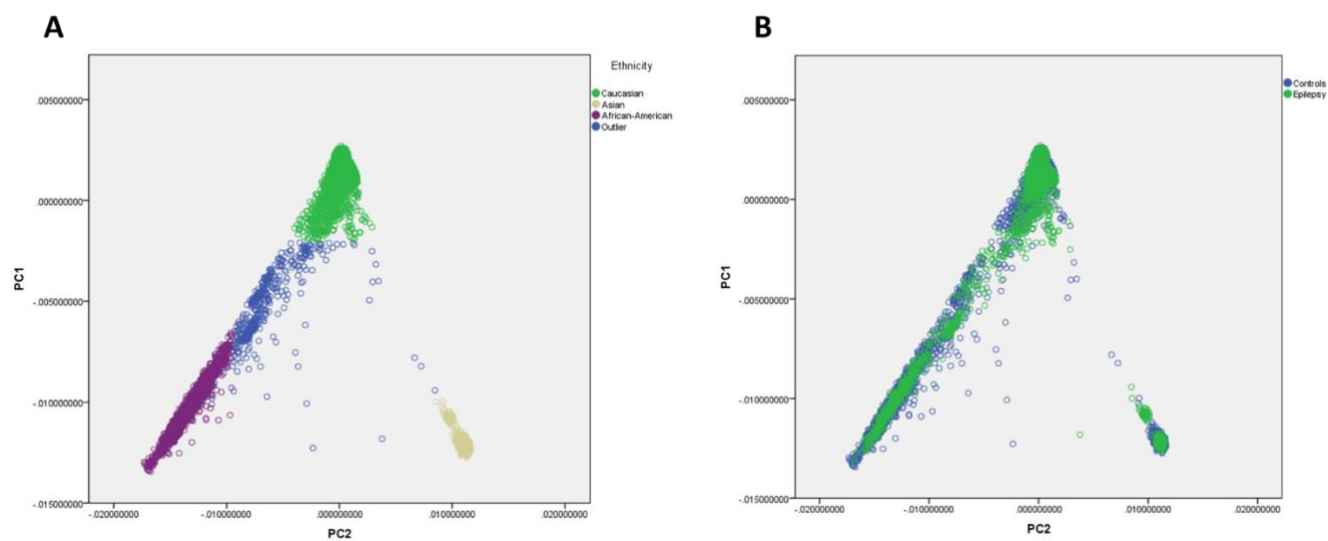

Supplementary Figure 1: Principal component plots. (A) Three different ethnicities and outliers inferred by principal components. (B) Principal component plot with colours stratified by epilepsy cases and controls.

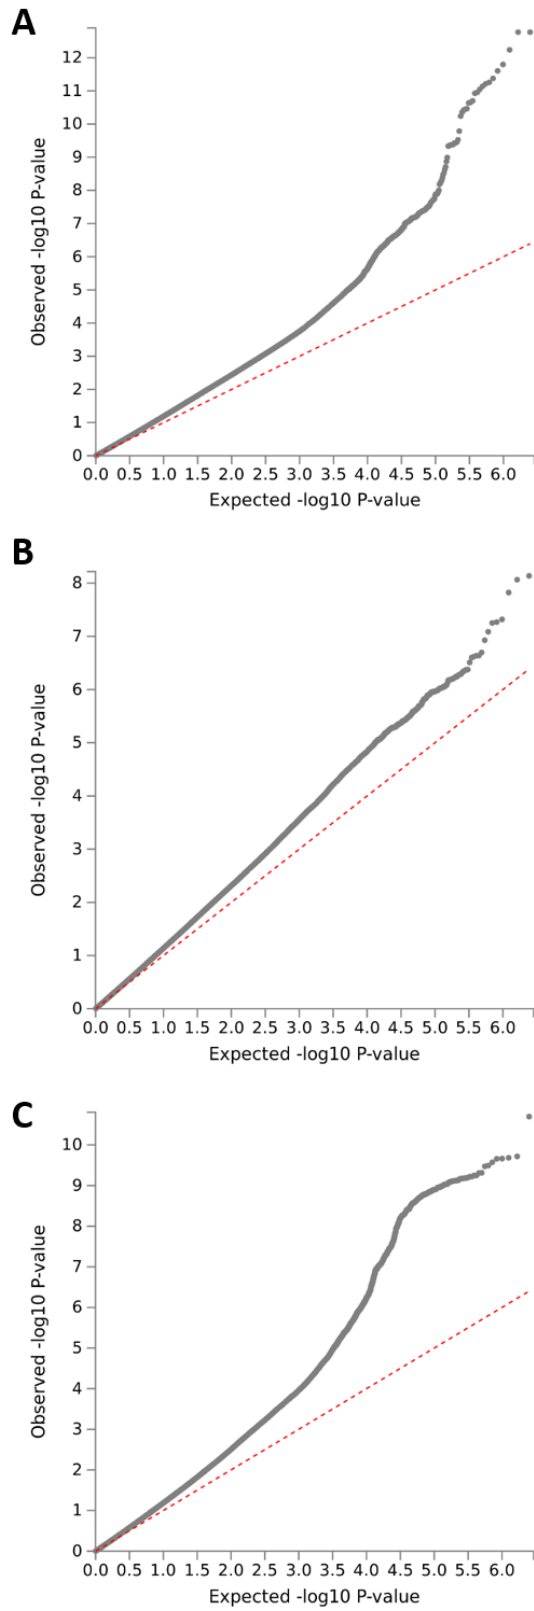

Supplementary Figure 2: Quantile-quantile (Q-Q) plots. Q-Q plots of meta-analyses of (A) *all epilepsy* ( $\lambda=1.25$ ), (B) *focal epilepsy* ( $\lambda=1.18$ ) and (C) *genetic generalized epilepsy* ( $\lambda=1.24$ ).

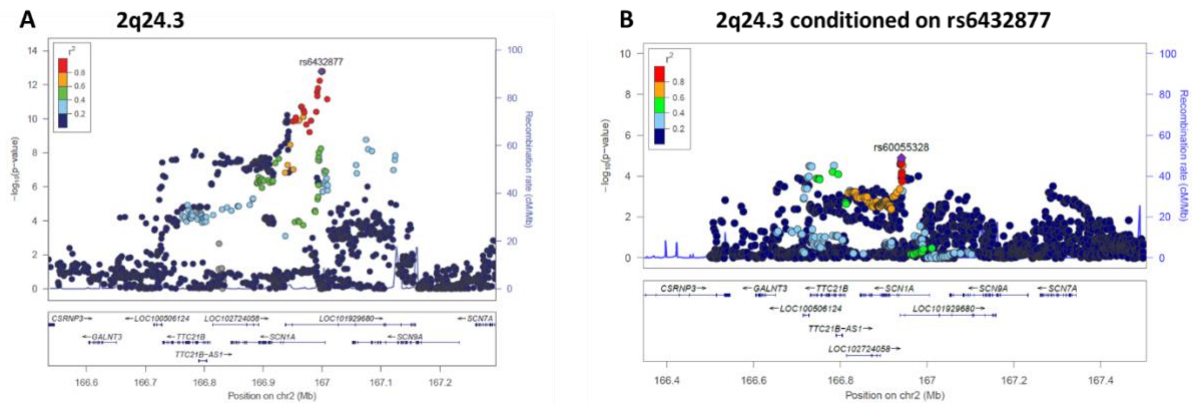

Supplementary Figure 3: Conditional analysis of 2q24.3 shows two independent signals associated with all epilepsy. The same 2q24.3 locus is shown before (**A**) and after (**B**) conditioning on the lead SNP in the locus (rs6432877). Negative log<sub>10</sub>-transformed P-values (Y-axis) are plotted against chromosomal position (x-axis). The conditional threshold for significance was set at  $2 \times 10^{-5}$ , based on approximately 2,500 imputed variants per 1MB region.

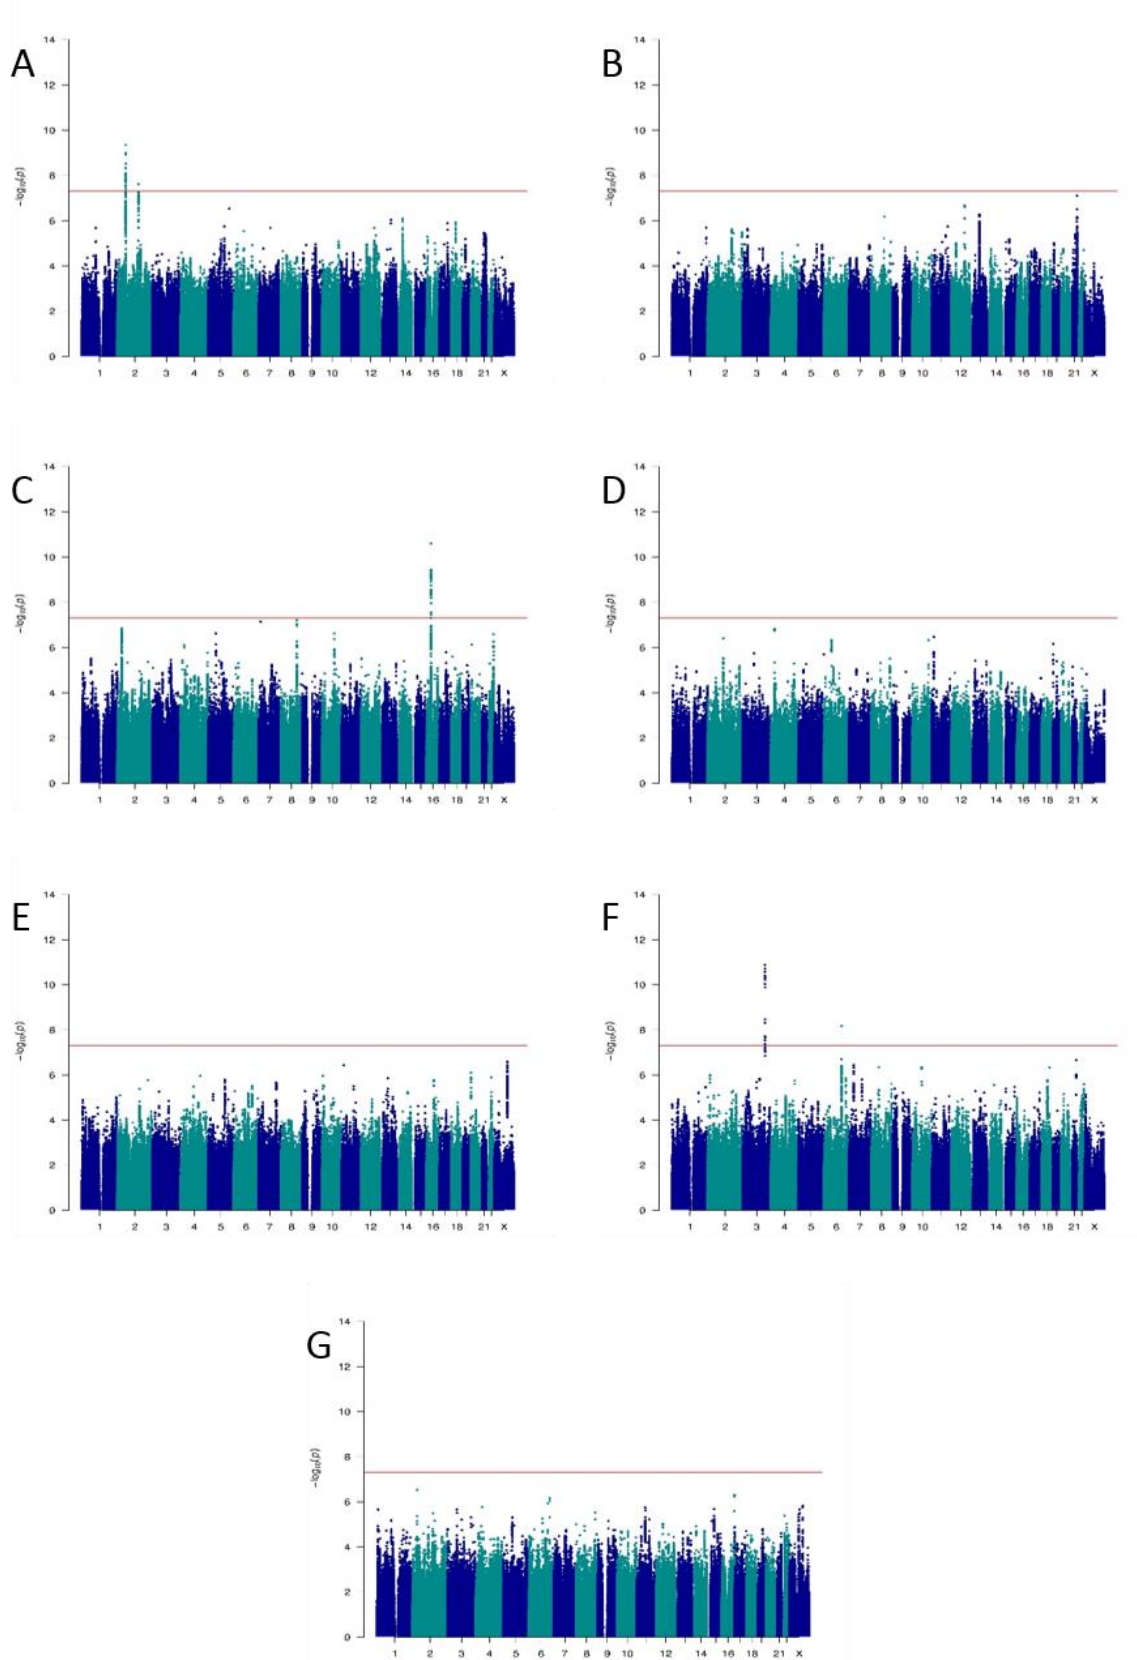

Supplementary Figure 4: Manhattan plots for the 7 epilepsy subtypes. *Chromosomal position is plotted on the X-axis and  $-\log_{10}$  transformed P-values are plotted on the Y-axis. A. childhood absence epilepsy; B. juvenile absence epilepsy; C. juvenile myoclonic epilepsy; D. generalized tonic-clonic seizures alone; E. focal epilepsy, lesion negative; F. focal epilepsy with hippocampal sclerosis; G. focal epilepsy, other lesion*



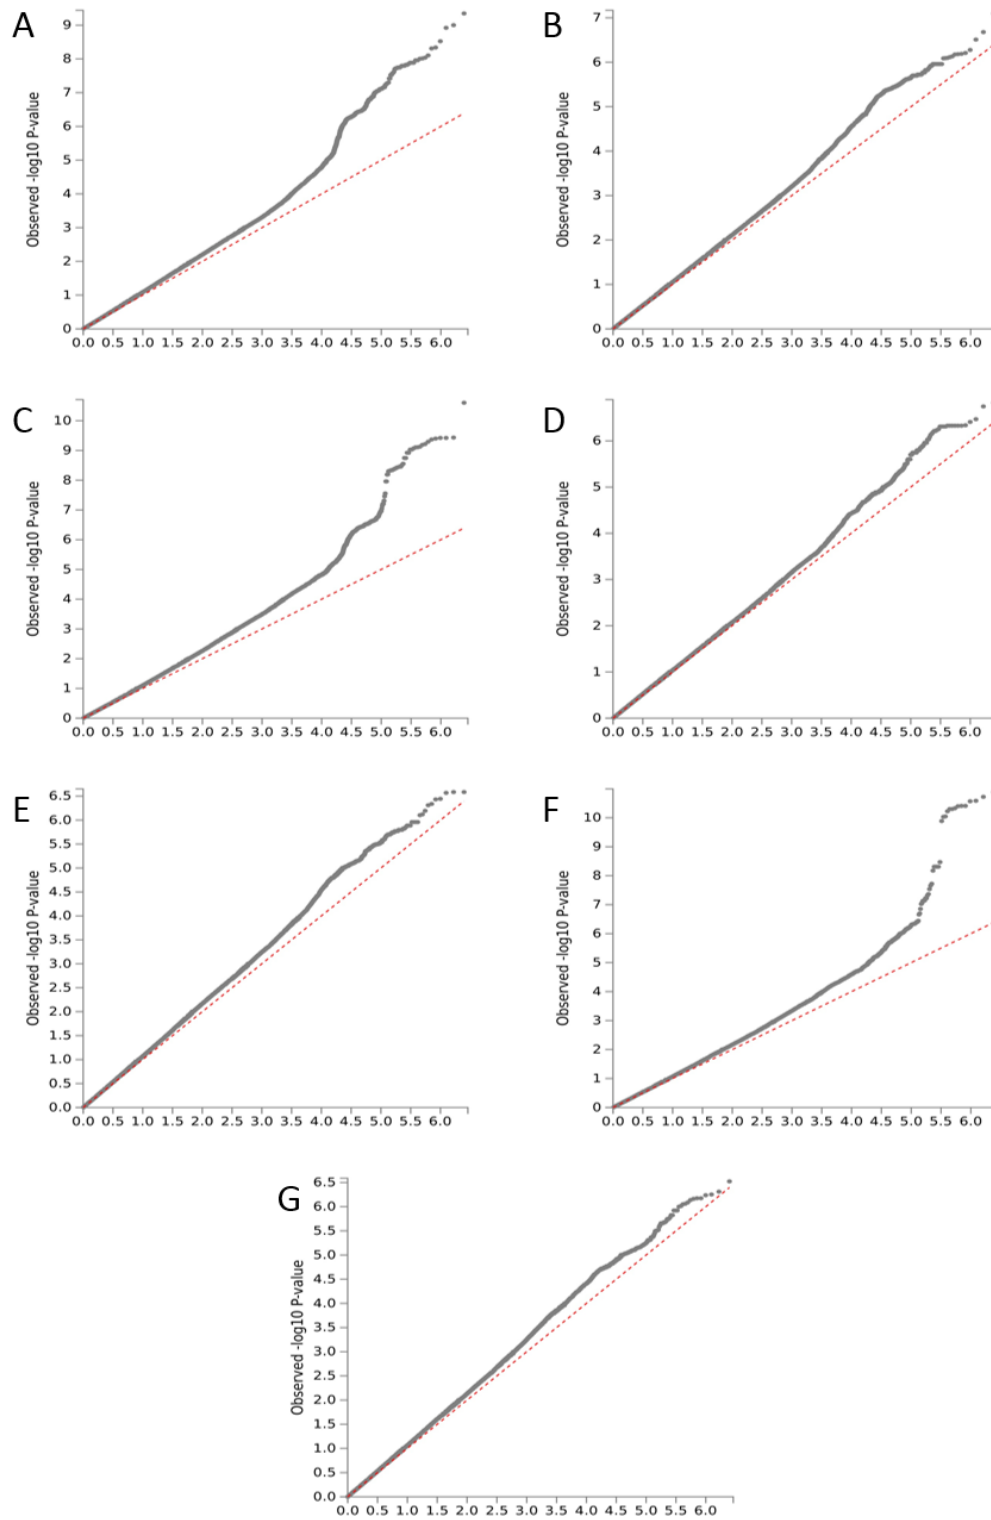

Supplementary Figure 5: Q-Q plots of the 7 epilepsy subtypes. A. *childhood absence epilepsy*; B. *juvenile absence epilepsy*; C. *juvenile myoclonic epilepsy*; D. *generalized tonic-clonic seizures alone*; E. *focal epilepsy, lesion negative*; F. *focal epilepsy with hippocampal sclerosis*; G. *focal epilepsy, other lesion*

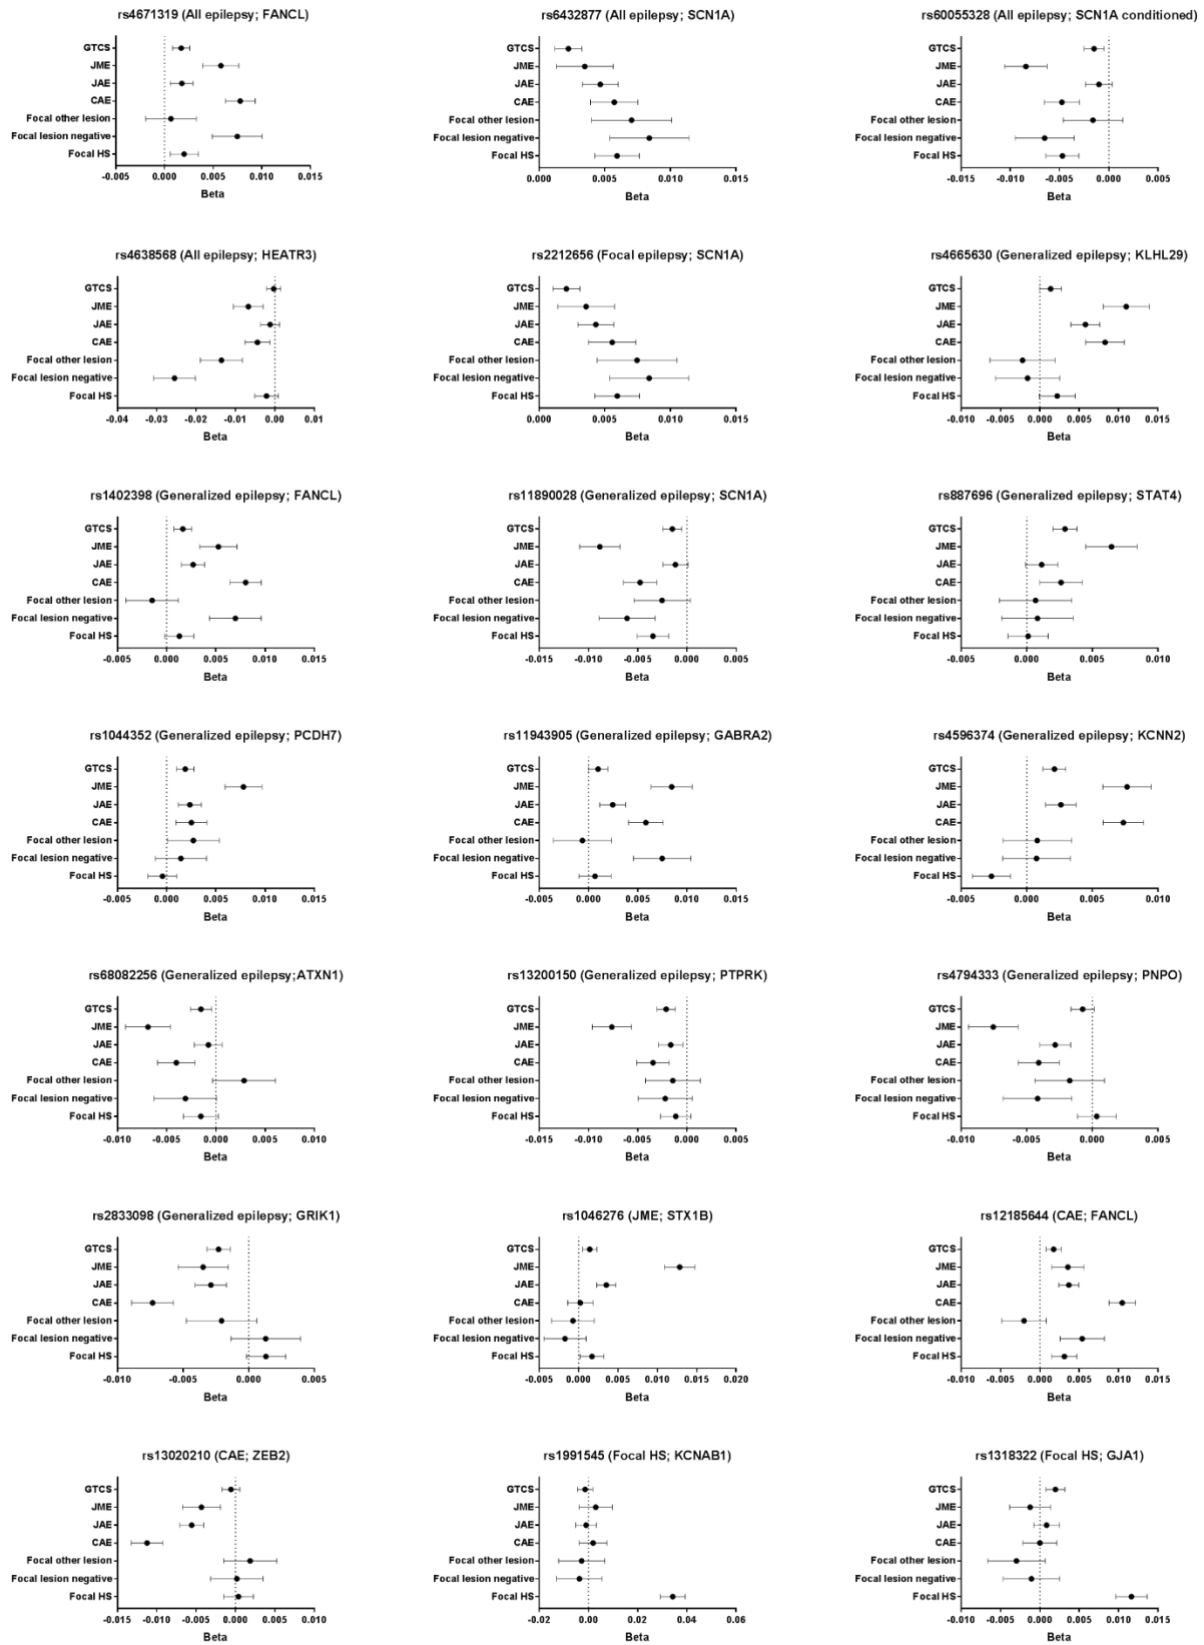

Supplementary Figure 6: Forest plot of the lead SNPs from genome-wide significant loci in the 7 epilepsy subtypes. The subphenotype where the lead SNP was identified is displayed in parentheses, followed by a representative gene in the locus. Beta regression coefficients with standard errors from BOLT-LMM are displayed on the X-axis.

**A 2p16.1**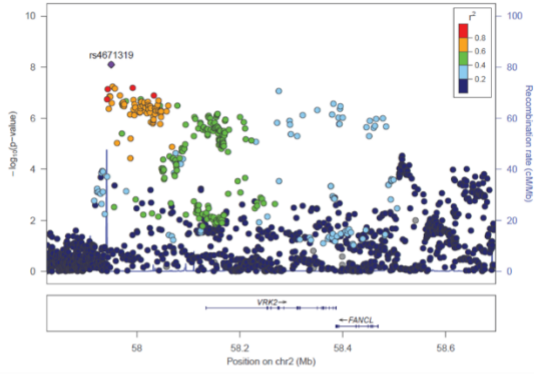**B 2q24.3**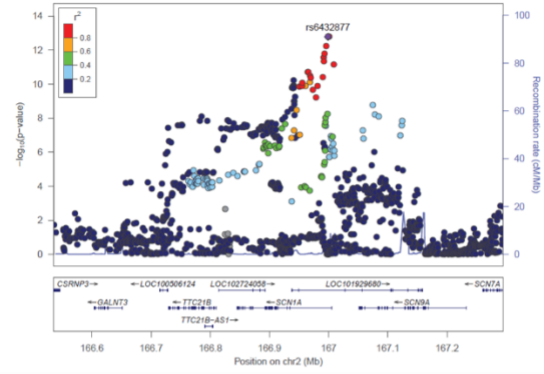**C 16q12.1**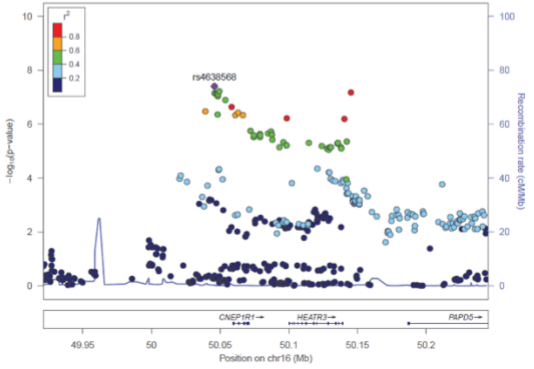**D 2q24.3**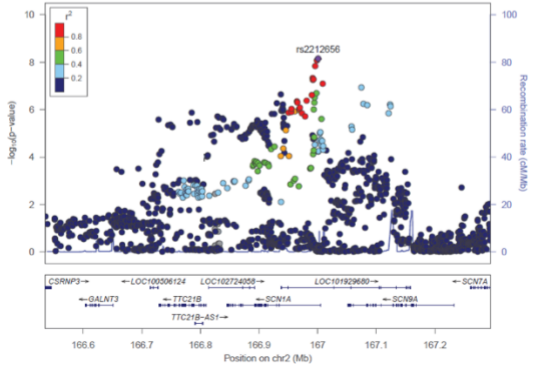**E 2p24.1**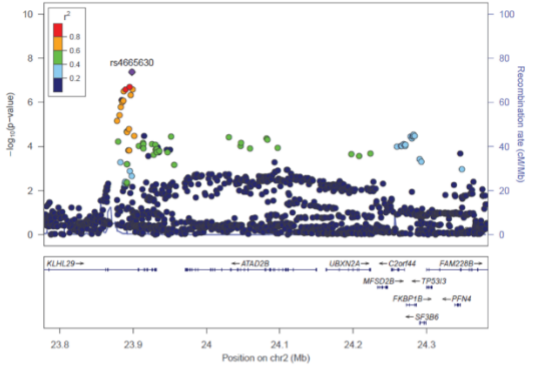**F 2p16.1**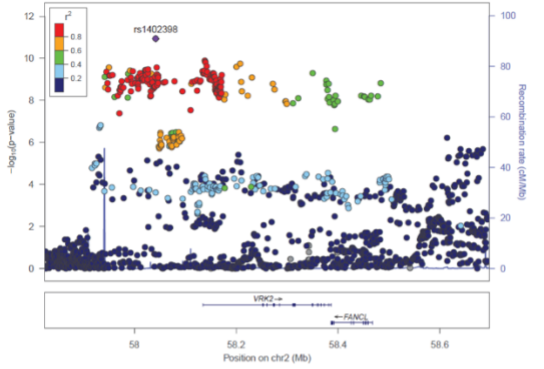**G 2p24.3**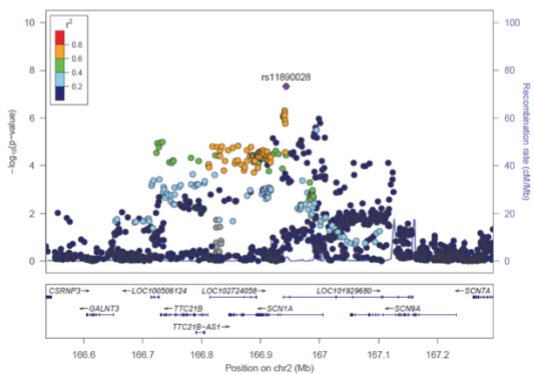**H 2q32.3**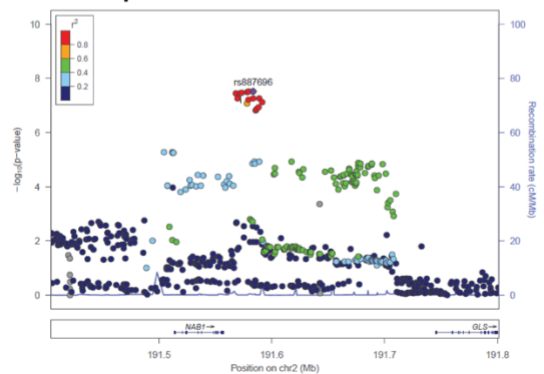

**I 4p15.1**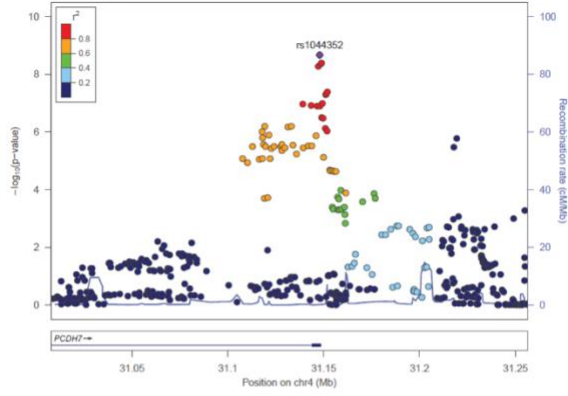**J 4p12**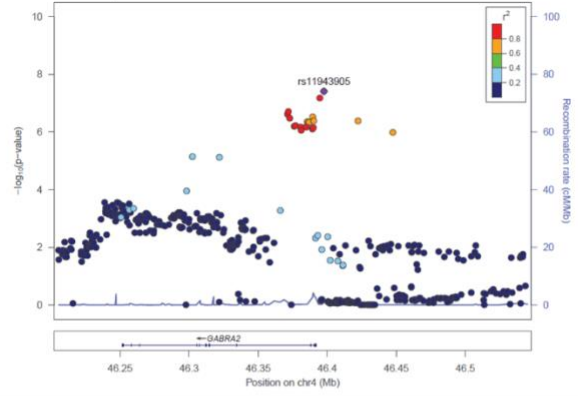**K 5q22.3**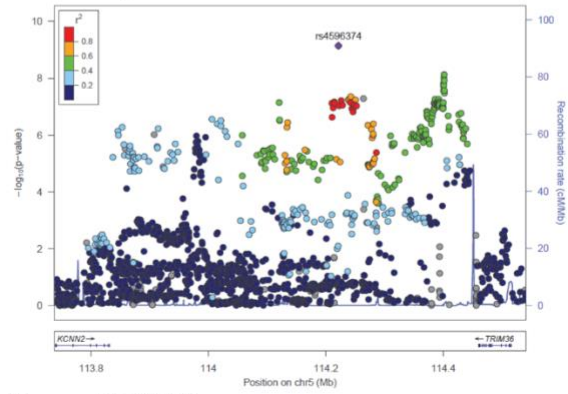**L 6p22.3**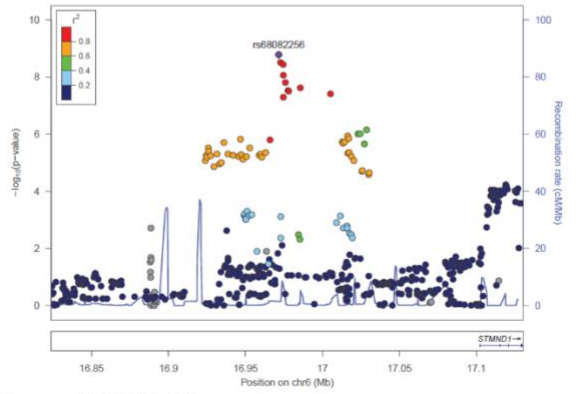**M 6q22.33**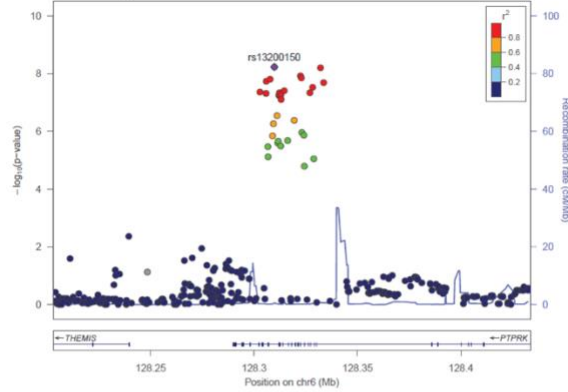**N 17q21.32**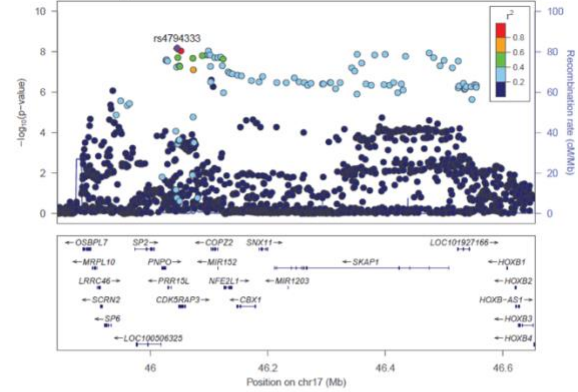**O 21q22.11**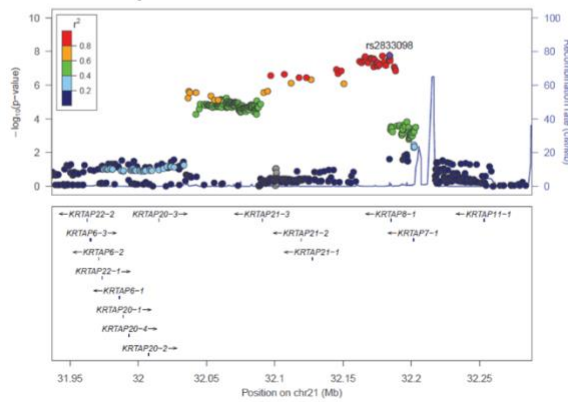**P 2p16.1**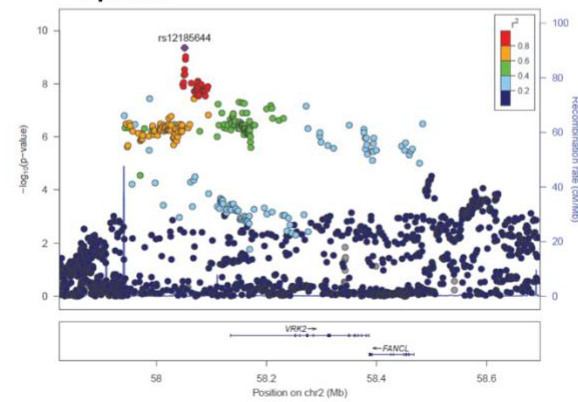

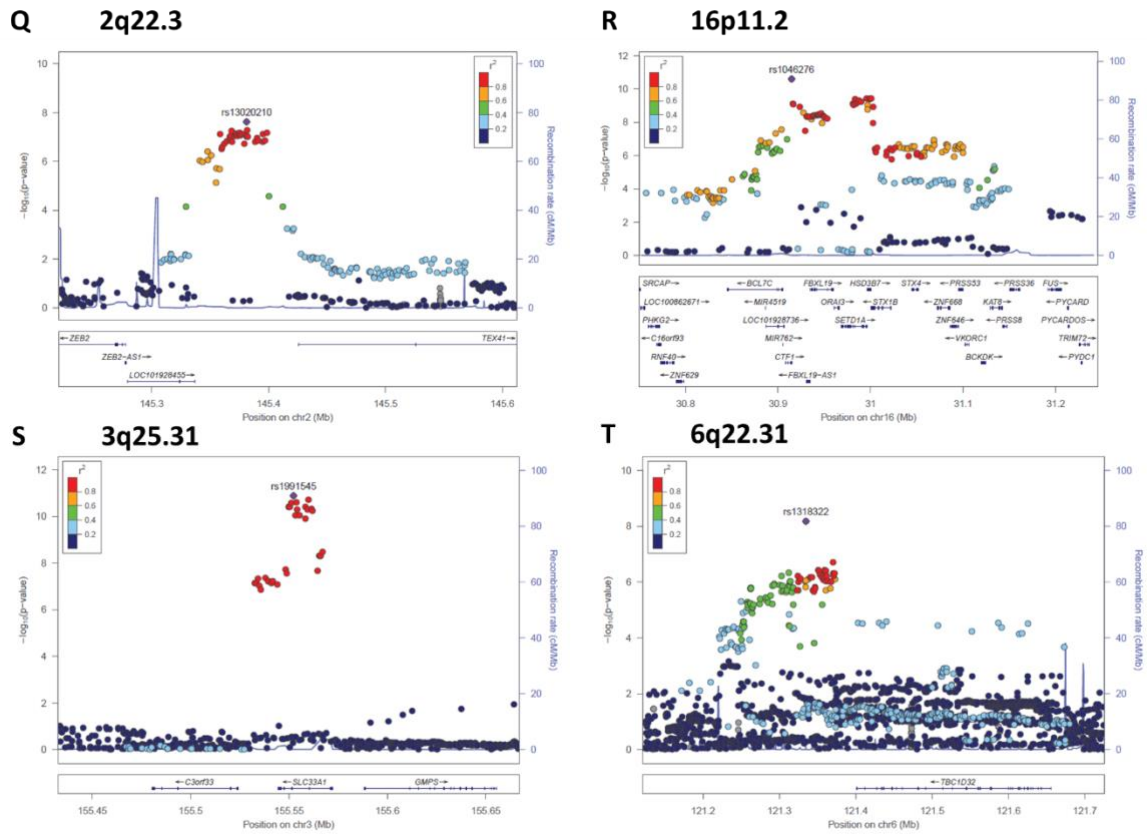

Supplementary Figure 7: Locuszoom plots for all genome-wide significant loci. Genome-wide significant loci from (A-C) all epilepsy, (D) focal epilepsy, (E-O) genetic generalized epilepsy, (P-Q) childhood absence epilepsy, (R) juvenile myoclonic epilepsy, and (S-T) focal epilepsy with hippocampal sclerosis. SNPs are colored according to pairwise LD with respect to the lead SNP of the locus. Negative log<sub>10</sub>-transformed P-values (Y-axis) are plotted against chromosomal position (x-axis).

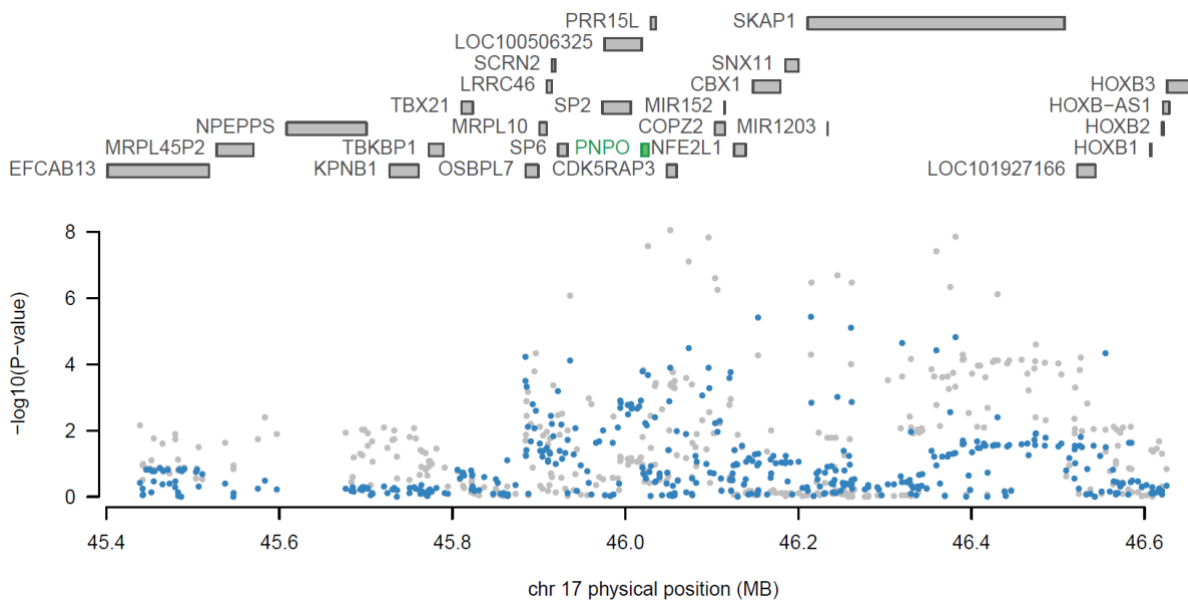

Supplementary Figure 8: GWAS results of genetic generalized epilepsy conditioned on expression of PNPO. Expression of PNPO was imputed using TWAS based on expression QTL weights from dorsolateral prefrontal tissue (CommonMind database). Unconditional GWAS results are displayed in grey and the same SNPs conditioned on expression of PNPO are displayed in blue.

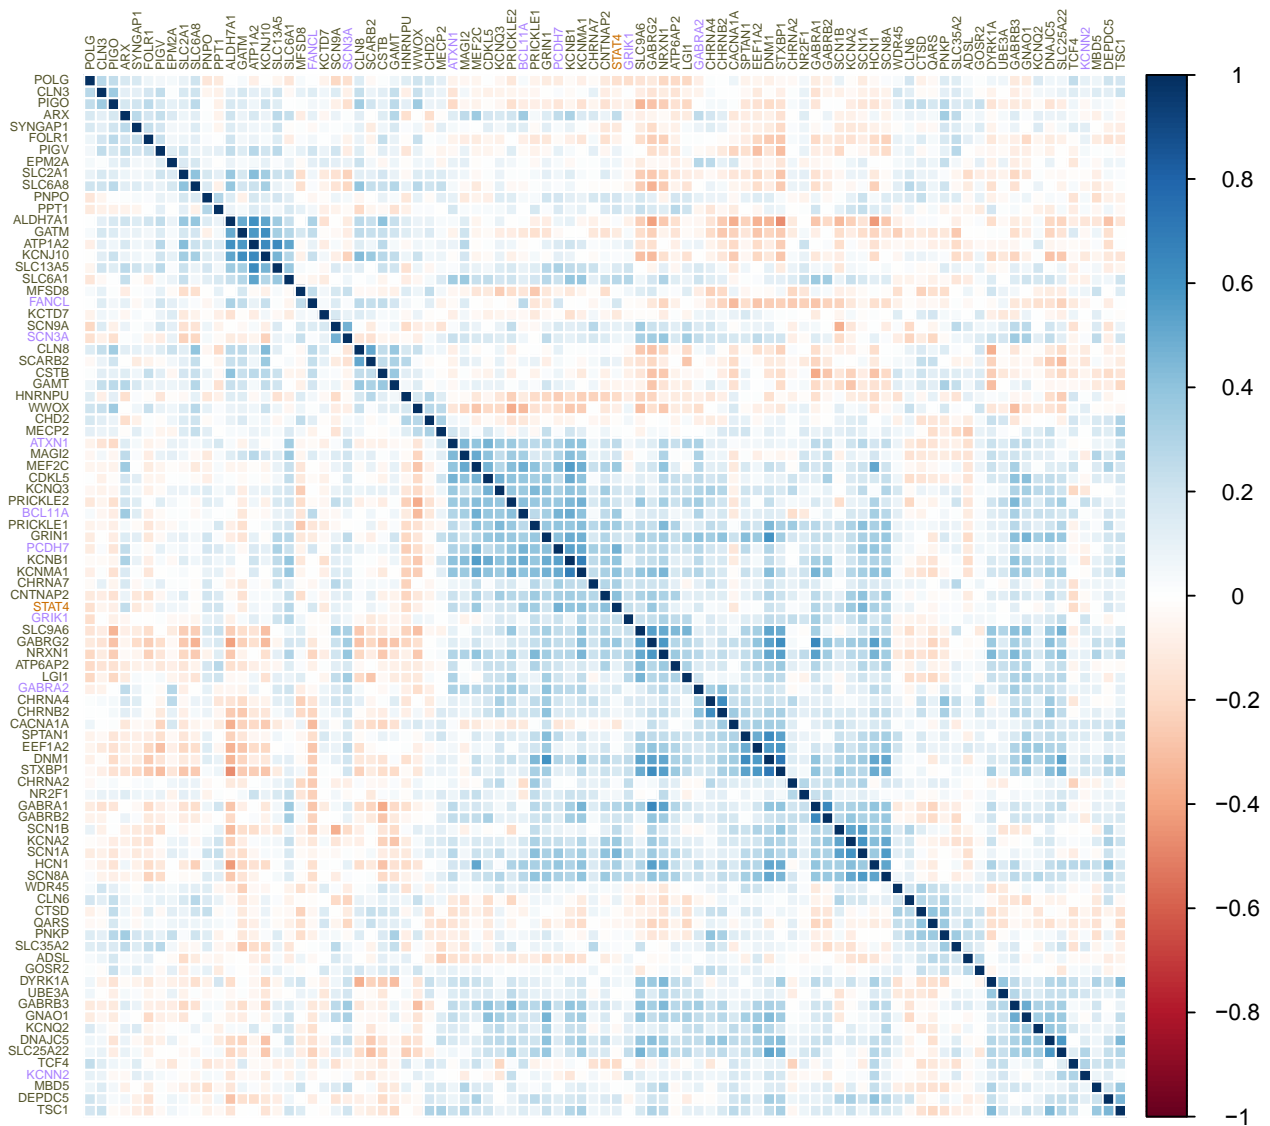

**Supplementary Figure 9: Gene co-expression matrix produced by brain-coX.** Average correlation over 7 brain gene expression datasets between the expression of 80 known epilepsy genes (Supplementary Table 8, displayed with black font for gene labels), 8 GWAS candidate genes (purple font) and STAT4 (red font) across 7 datasets. Known epilepsy and candidate genes are only shown if found in all datasets.

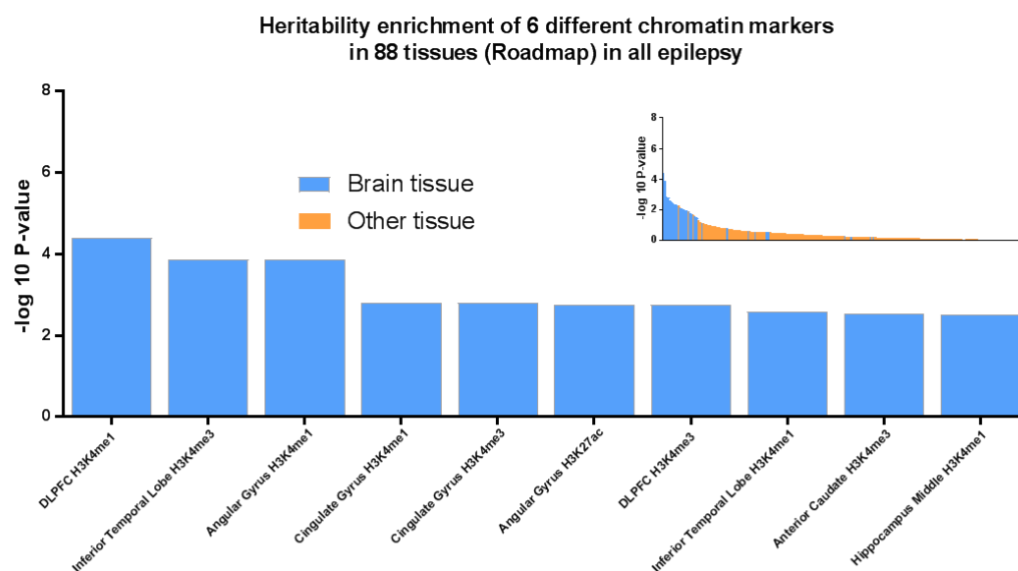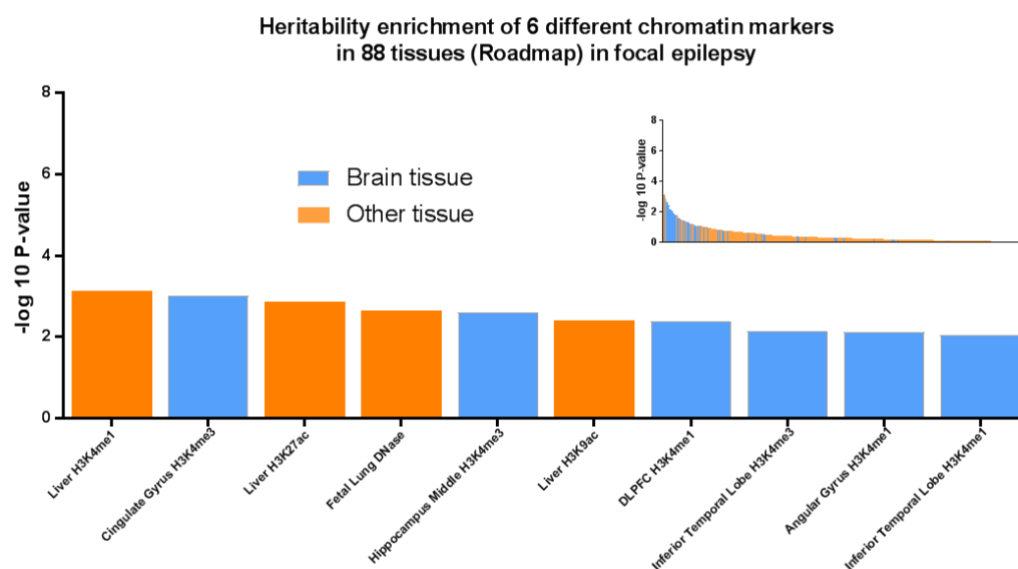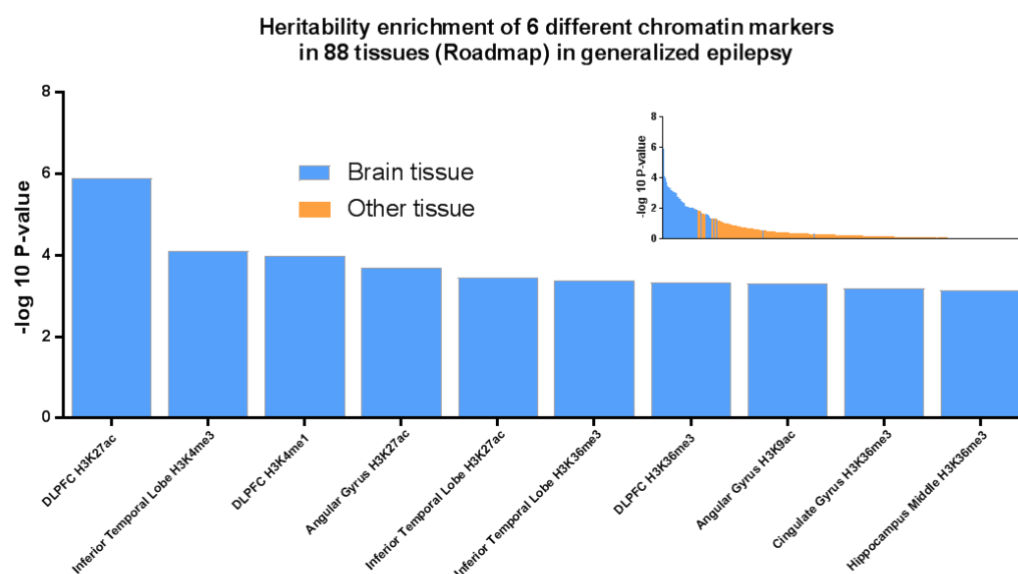

Supplementary Figure 10: Heritability enrichment of 6 different chromatin markers in 88 tissues (data from the Roadmap Epigenomics Project) in (top) all epilepsy, (middle) focal epilepsy and (bottom) genetic generalized epilepsy GWAS.



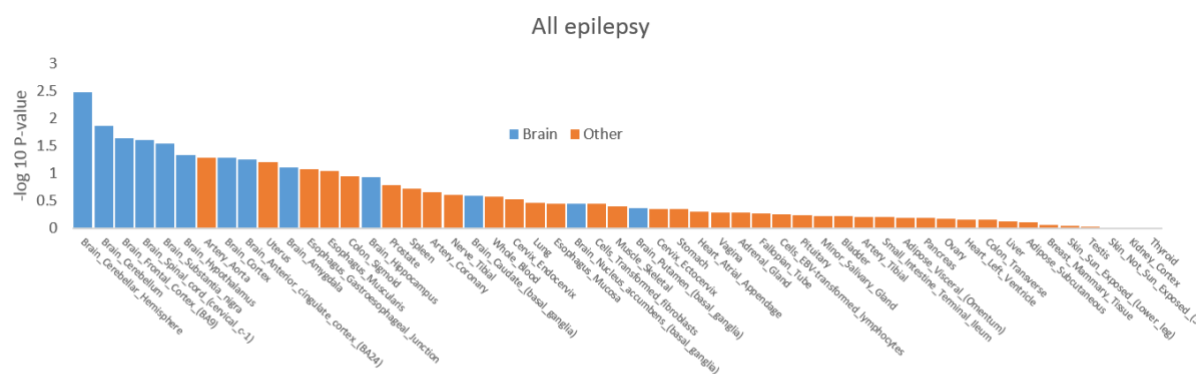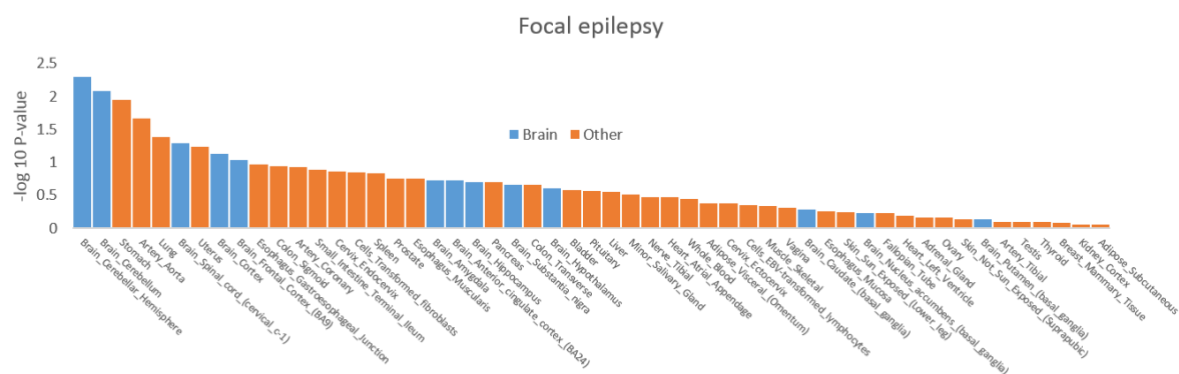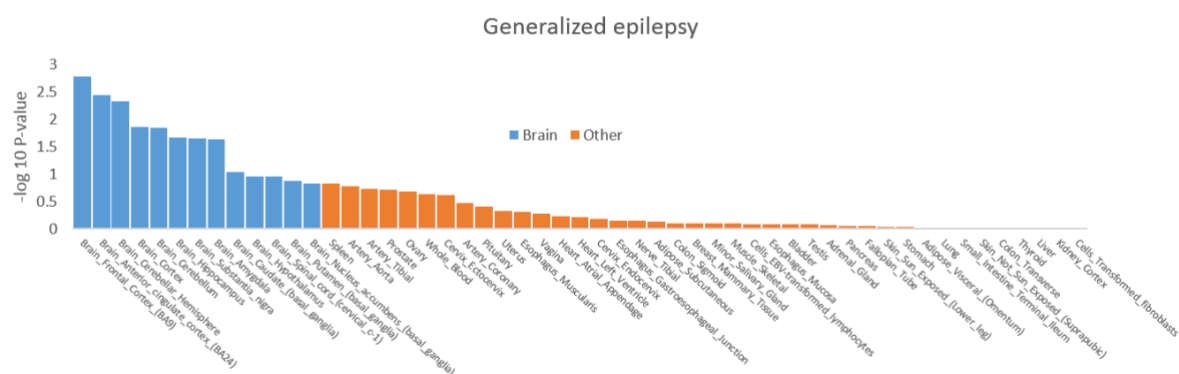

Supplementary Figure 11: Heritability enrichment of genes expressed in 53 tissues in (top) all epilepsy, (middle) focal epilepsy and (bottom) genetic generalized epilepsy GWAS. Gene expression data from the gene-tissue expression (GTEx) consortium was used.



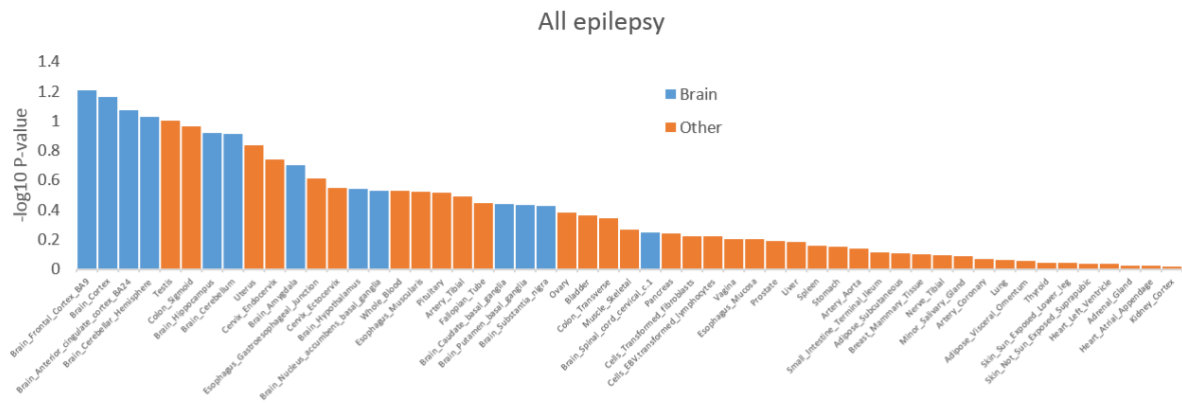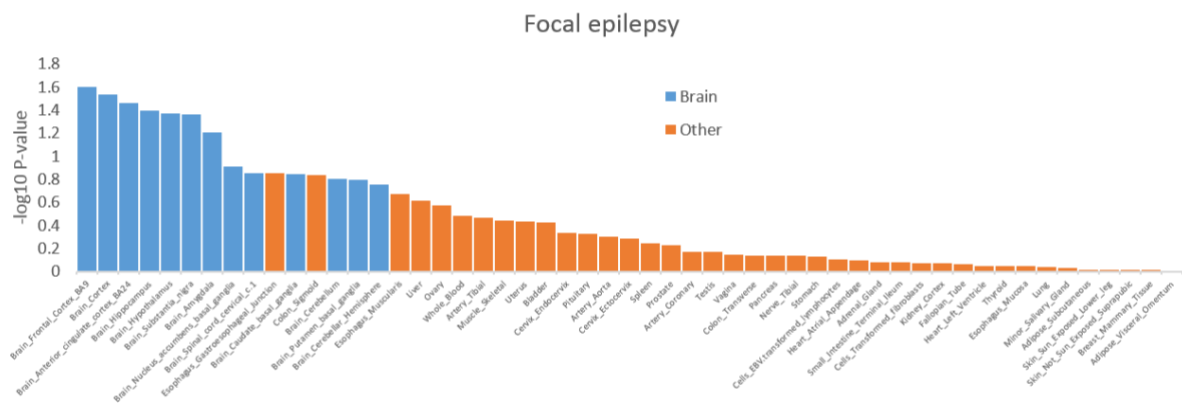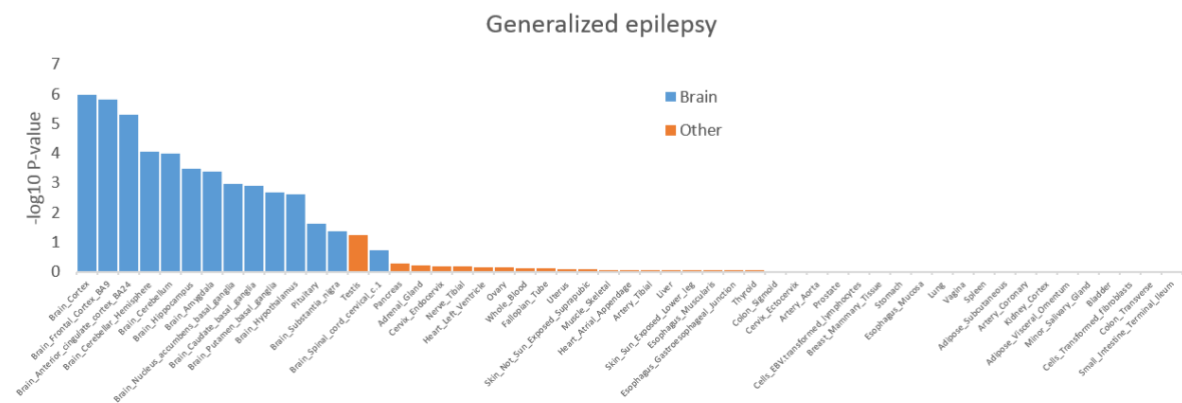

Supplementary Figure 12: MAGMA gene expression enrichment analysis to test enrichment of gene expression in any of 53 tissues (from the GTEx consortium database) in (top) all epilepsy, (middle) focal epilepsy and (bottom) genetic generalized epilepsy GWAS.

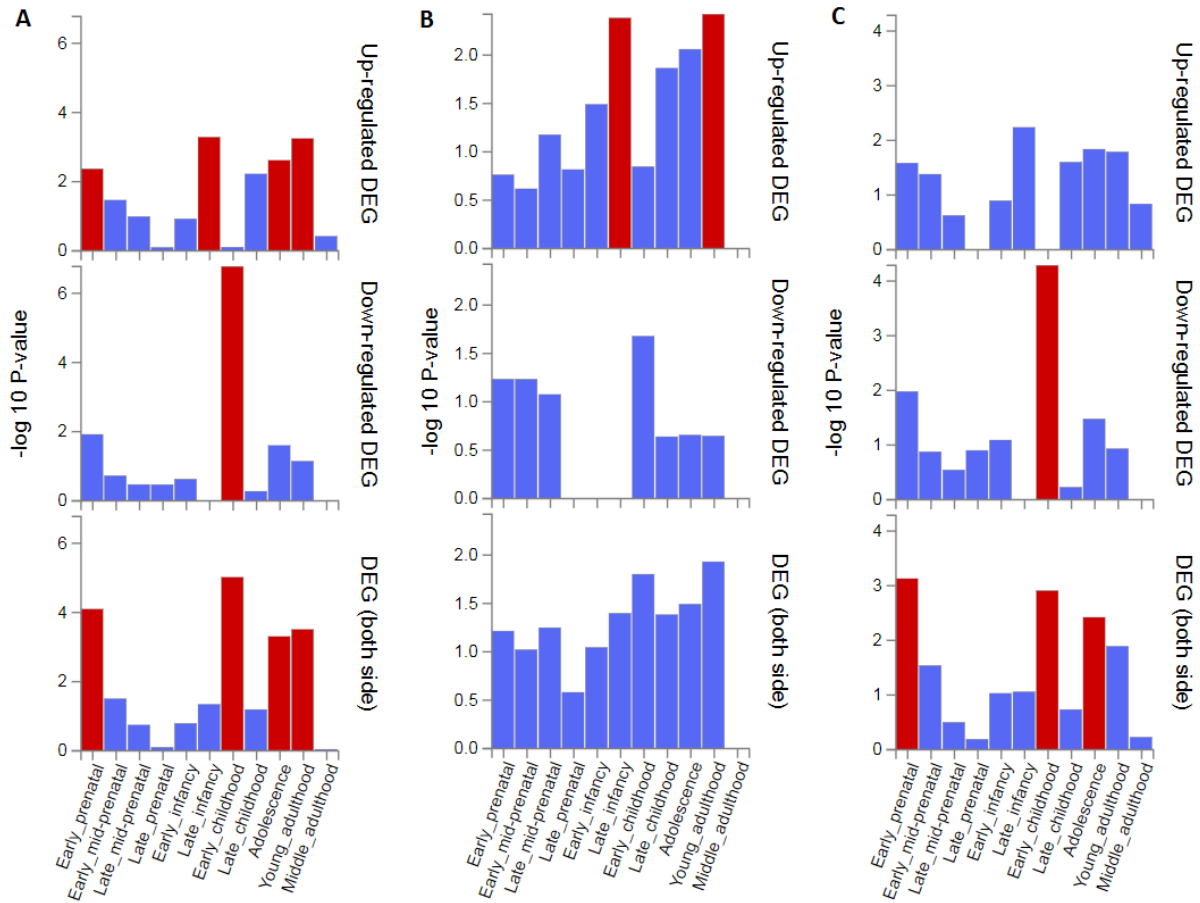

Supplementary Figure 13: Differentially expressed genes across the lifespan for all (A), focal (B) and generalized epilepsies (C). Significantly enriched DEG sets ( $P_{\text{bon}} < 0.05$ ) are highlighted in red. Gene transcription data from postmortem human brain specimens from the Brainspan Atlas of the Developing Human Brain was used.

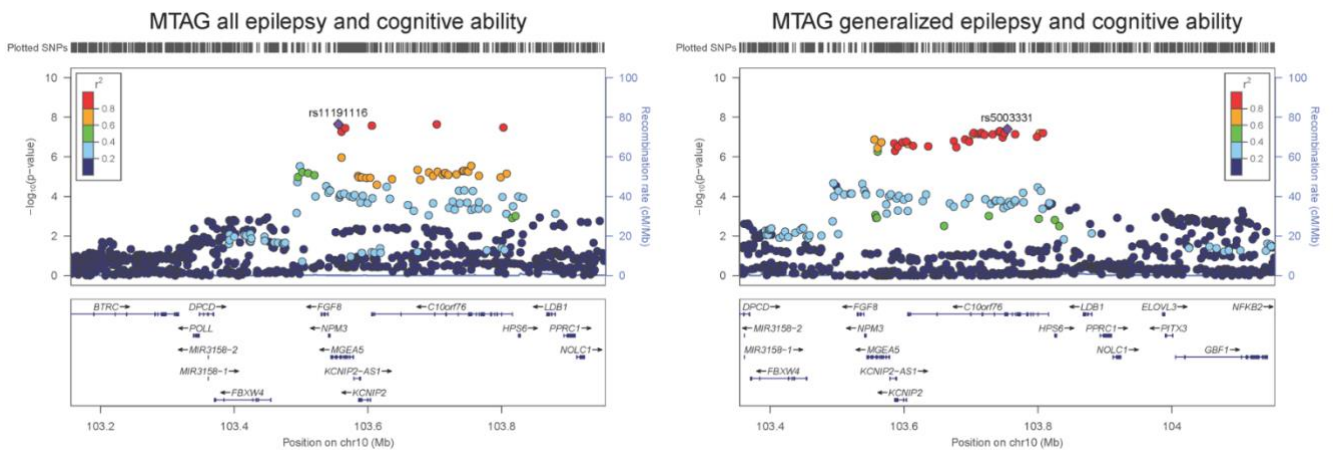

Supplementary Figure 14: Results of MTAG analysis when all epilepsy (left) and genetic generalized epilepsy (right) GWAS are paired with the genetically correlated GWAS of cognitive ability.

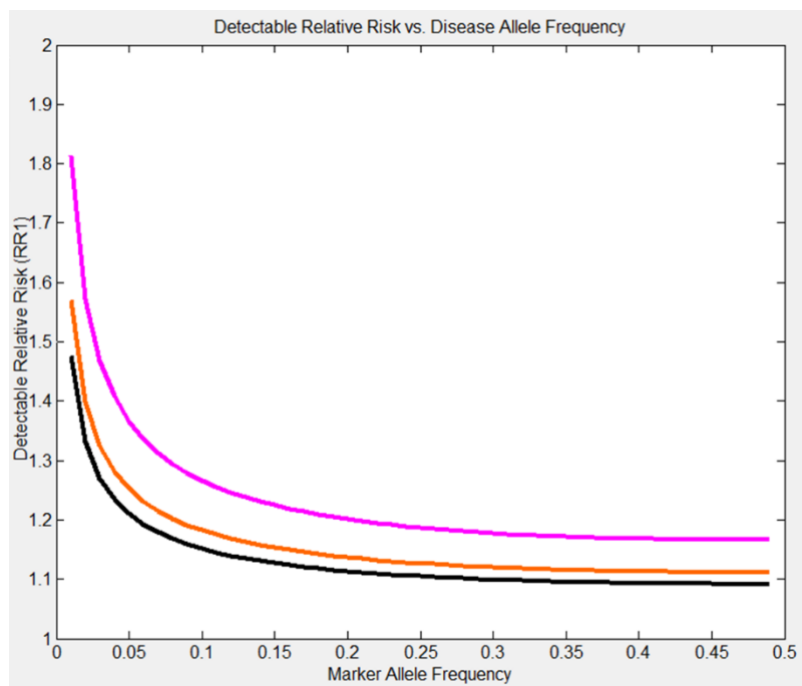

Supplementary Figure 15: Power curves for GWAS. We estimated to have 80% power to detect a genetic association for all epilepsy (black), focal epilepsy (orange) and genetic generalized epilepsy (pink).

## Supplementary References

1. Meng, W. *et al.* A Genome-Wide Association Study Finds Genetic Associations with Broadly-Defined Headache in UK Biobank (N = 223,773). *EBioMedicine* **28**, 180-186 (2018).
2. Lambert, J.-C. Meta-Analysis of 74,046 Individuals Identifies 11 New Susceptibility Loci for Alzheimer's Disease. *Nat. Genet.* **45**, 1452–1458 (2013).
3. Simón-Sánchez, J. *et al.* Genome-wide association study reveals genetic risk underlying Parkinson's disease. *Nat. Genet.* **41**, 1308–1312 (2009).
4. NINDS Stroke Genetics Network (SiGN), International Stroke Genetics Consortium (ISGC). Loci associated with ischaemic stroke and its subtypes (SiGN): a genome-wide association study. *Lancet. Neurol.* **15**, 174–84 (2016).
5. van't Hof, F. N. G. *et al.* Shared genetic risk factors of intracranial, abdominal, and thoracic aneurysms. *J. Am. Heart Assoc.* **5** (2016).
6. Feenstra, B. *et al.* Common variants associated with general and MMR vaccine-related febrile seizures. *Nat. Genet.* **46**, 1274–1282 (2014).
7. Gormley, P. *et al.* Meta-analysis of 375,000 individuals identifies 38 susceptibility loci for migraine. *Nature genetics* 856–866 (2016).
8. Ripke, S. *et al.* Biological insights from 108 schizophrenia-associated genetic loci. *Nature* **511**, 421–427 (2014).
9. Sklar, P. *et al.* Large-scale genome-wide association analysis of bipolar disorder identifies a new susceptibility locus near ODZ4. *Nat. Genet.* **43**, 977–985 (2011).
10. Ripke, S. *et al.* A mega-analysis of genome-wide association studies for major depressive disorder. *Mol. Psychiatry* **18**, 497–511 (2013).
11. Middeldorp, C. M. *et al.* A Genome-Wide Association Meta-Analysis of Attention-Deficit/Hyperactivity Disorder Symptoms in Population-Based Paediatric Cohorts. *J. Am. Acad. Child Adolesc. Psychiatry* **55**, 896-905 (2016).
12. Bentham, J. *et al.* Genetic association analyses implicate aberrant regulation of innate and adaptive immunity genes in the pathogenesis of systemic lupus erythematosus. *Nat. Genet.* **47**, 1457–1464 (2015).
13. Sawcer, S. *et al.* Genetic risk and a primary role for cell-mediated immune mechanisms in multiple sclerosis. *Nature* **476**, 214–219 (2011).
14. Sniekers, S. *et al.* Genome-wide association meta-analysis of 78,308 individuals identifies new loci and genes influencing human intelligence. *Nat. Genet.* **49**, 1107–1112 (2017).
15. Van Den Berg, S. M. *et al.* Harmonization of neuroticism and extraversion phenotypes across inventories and cohorts in the Genetics of Personality Consortium: An application of item response theory. *Behav. Genet.* **44**, 295–313 (2014).
16. de Moor, M. H. M. *et al.* Meta-analysis of genome-wide association studies for personality. *Mol. Psychiatry* **17**, 337–349 (2012).
